1 **Prefrontal suppression in short-video viewing: unraveling the neural**  
2 **correlates of self-control**

3 Conghui Su <sup>1,†</sup>, Binyu Teng <sup>1,†</sup>, Hui Zhou <sup>1,3</sup>, Fengji Geng <sup>2\*</sup>, Yuzheng Hu <sup>1,3,4,5\*</sup>

4 <sup>1</sup> Department of Psychology and Behavioral Sciences, Zhejiang University, Hangzhou 310058,  
5 China

6 <sup>2</sup> Department of Curriculum and Learning Sciences, College of Education, Zhejiang University,  
7 Hangzhou 310007, China

8 <sup>3</sup> The State Key Lab of Brain-Machine Intelligence, <sup>4</sup> MOE Frontiers Science Center for Brain  
9 Science & Brain-Machine Integration, Zhejiang University, Hangzhou 310058, China

10 <sup>5</sup> Brain and Cognitive Research Institute, School of Medicine, Hangzhou City University, Hangzhou  
11 310015, China

12 <sup>†</sup> These authors contributed equally

13 <sup>\*</sup> Corresponding author.

14

15 Fengji Geng, Ph.D. TEL: (+86) 0571-88276113

16 Address: Department of Curriculum and Learning Sciences, Zhejiang University, Zijingang Campus,  
17 866 Yuhangtang Road, Hangzhou, Zhejiang Province 310058, China.

18 Email: [gengf@zju.edu.cn](mailto:gengf@zju.edu.cn)

19

20 Yuzheng Hu, Ph.D. TEL: (+86)137-5811-6751;

21 Address: Department of Psychology and Behavioral Sciences, Zhejiang University, Zijingang  
22 Campus, 866 Yuhangtang Road, Hangzhou, Zhejiang Province 310058, China.

23 Email: [huyuzheng@zju.edu.cn](mailto:huyuzheng@zju.edu.cn)

24

25 **Abstract**

26 The recent surge in short-video application usage has raised concerns about potential mental health  
27 risks. Using a novel video-watching task, we investigated the neuropsychological mechanisms  
28 underlying self-control during short-video viewing from a dual-system perspective. Results  
29 revealed watching preferred videos significantly activated the amygdala (System I) and deactivated  
30 the control regions (System II), with individuals with lower trait self-control being suppressed more.  
31 Dynamic causal modelling revealed the amygdala inhibited control regions during preferred  
32 viewing, while control regions downregulated the amygdala during less-preferred viewing. The  
33 control regions also demonstrated enhanced activation during cognitive control and inner-state  
34 monitoring tasks, with the latter correlating with trait self-control. These findings suggest  
35 preference-based video-watching suppresses prefrontal areas that represent rules and support self-  
36 awareness, enabling bottom-up limbic processes to dominate attention. This study provides insights  
37 into the neuropsychological impacts of short-video applications use, informing policies and  
38 interventions to promote healthier technology use and mitigate potential adverse effects.

39

40

41 **Keywords:** short-video watching; self-control; amygdala; dorsolateral prefrontal cortex;  
42 mindfulness

43 **Main**

44 As short-video applications continue to surge in popularity, concerns about the consequences of  
45 excessive screen time are growing <sup>1</sup>. Globally, short-video platforms, such as YouTube Shorts,  
46 TikTok, and Instagram Reels, have been utilized by billions of users. In China alone, there are about  
47 one billion online short-video watchers, accounting for 94.8% of its internet users <sup>2</sup>. In addition to  
48 growing in user population, the average time spent with these apps is also on the rise. For example,  
49 it has been reported that an average user opens TikTok 19 times and spends an average of 95 minutes  
50 on the app in a single day <sup>3</sup>. These applications tap into the human desire for novelty and immediate  
51 gratification, making it difficult for individuals to resist the allure of binge-watching. Additionally,  
52 the algorithms employed by these platforms are designed to personalize and optimize the content  
53 based on users' preferences, further reinforcing the cycle of engagement <sup>4</sup>. That is, the constant  
54 availability of engaging content, combined with the accurate recommendation strategies employed  
55 by these platforms, may erode self-control, manifesting in prolonged use or addictive-like binge-  
56 watching in some vulnerable individuals <sup>5,6</sup>. Studies have shown that excessive short-video watching  
57 can negatively affect mental health <sup>7,8</sup> and cognitive functions <sup>9,10</sup>. This emerging public health  
58 concern underscores an urgent need to understand the underlying neuropsychological mechanism  
59 of self-control during short-video watching. Such knowledge could inform the development of  
60 strategies to minimize harmful usage patterns, promote healthier use behavior, and guide policy-  
61 making around digital media consumption.

62  
63 Excessive using behaviors, ranging from over-use of Internet to severe drug addiction, are often  
64 linked to the psychological construct of self-control <sup>11,12</sup>, an important ability that allows individuals  
65 to regulate their thoughts, emotions, and behaviors for the pursuit of long-term goals <sup>13</sup>. As an  
66 umbrella construct bridging concepts from different research fields, questionnaires are widely used  
67 to characterize this competence with different names (e.g., impulsivity, conscientiousness, self-  
68 regulation, willpower, et. al) <sup>14,15</sup>. High levels of self-control are generally associated with positive  
69 outcomes in various aspects of life, contributing to success and overall well-being <sup>16-18</sup>. Conversely,  
70 individuals with lower levels of self-control are more prone to develop addictive behaviors <sup>11,19</sup>. For  
71 example, previous studies have shown that adolescents with higher trait self-control are less likely  
72 to develop dependence on short-videos <sup>6</sup> and are more capable of mitigating the negative impacts  
73 of their environment <sup>20</sup>. Although self-reported self-control serves as a reliable predictor of real-life  
74 outcomes <sup>15-17,21</sup>, the underlying neuropsychological mechanisms of self-control remains  
75 incomplete to explain how modern technology such as short-video apps grab and hold large amount  
76 of attention.

77  
78 Among many theoretical frameworks that have sought to shed light on the mechanisms underlying  
79 self-control <sup>22</sup>, the dual-system model <sup>23</sup> has gained significant recognition. Despite its variations  
80 and revisions, the model's core premise remains the same — self-control is driven by two distinct  
81 systems known as System I and System II <sup>22</sup>. System I, also referred to as the automatic system, is  
82 highly responsive to environmental stimuli and gives rise to habitual behaviors and urges to seek  
83 immediate gratification <sup>22</sup>. Neuroimaging studies have provided evidence linking this system to  
84 subcortical regions involved in emotion and reward processing, particularly the amygdala and  
85 ventral striatum <sup>24</sup>. On the other hand, System II, the reflective system, is primarily guided by goals

86 or rules stored in working memory<sup>25</sup>. It plays a crucial role in flexible responses, such as monitoring  
87 and resolving conflicts, overriding habitual tendencies and resisting temptations, with the prefrontal  
88 cortex and cingulate cortex as the main neural correlates<sup>26</sup>.

89  
90 Self-control involves a balance between the two systems<sup>27</sup>, and it has been commonly thought that  
91 the exertion of top-down control by System II over System I is imperative for successful self-control  
92<sup>24</sup>. By leveraging the cognitive abilities associated with System II, individuals can effectively  
93 regulate their behaviors<sup>28</sup> and resist the pull of immediate gratification<sup>29</sup>. Therefore, previous  
94 research has underscored the System II's pivot role in self-control, examining its activity in  
95 resolving conflicts or inhibiting distractions through laboratory cognitive tasks, such as Flanker task,  
96 Go/No-Go task, and Stop Signal task<sup>30</sup>. However, self-control measured with these laboratory tasks  
97 has shown poor correlation with trait self-control assessed using questionnaires<sup>31-33</sup>, calling a  
98 necessity of examining the dynamic interaction between the two systems and its implications for  
99 real-life behaviors by using new task paradigms with better ecological validity<sup>34</sup>.

100  
101 To this end, we proposed a new perspective that emphasized the interplay between the two systems  
102 in regulation/dysregulation of excessive using behavior. In the case of short-video watching, a user  
103 either watches a clip to its end or selects an alternative, depending on the degree of affective  
104 satisfaction at the moment. When facing preferred audio-visual stimuli, the System I would rapidly  
105 activate, and a resultant bottom-up process would prevent System II from disrupting the viewing  
106 process. Instead, less satisfied content would trigger a top-down process from System II to make an  
107 adjustment to the viewing process. Through such a dynamic interplay between the two systems, the  
108 use of short-video apps can swiftly modulate brain activity to create a satisfied psychological state.  
109 While short duration of videos allows quick iterations between stay and switch to modulate the brain,  
110 tremendous variety, and an endless list personalized by artificial intelligent (AI) recommendation  
111 within short-video apps can significantly accelerate this process and enhance engagement.

112  
113 To depict the activation patterns and between-system interplay described above, we designed a novel  
114 and naturalistic video-watching task that allowed participants to voluntarily select their preferred  
115 content. By mimicking daily use behavior, this paradigm would recapitulate brain activity patterns  
116 emerging during video viewing in real-life situation. Given that losing track of one's agenda and  
117 surroundings is a typical phenomenon during short-video watching, the awareness of one's own  
118 behavior and the representation of one's long-term goals/plans would be weakened or overridden.  
119 As these functions are critical for self-control, it is reasonable to hypothesize that brain activation  
120 during this video task would manifest one's trait self-control level. In addition, as these functions  
121 are supported by System II<sup>35</sup>, the activation of System II may be suppressed when engrossed in  
122 video watching. To contrast the brain activation of the two systems during video watching to that  
123 when performing cognitive tasks, we incorporated two traditional cognitive tasks, the Go/No-Go  
124 task and the Dots task (rule-switching). In addition, the ability to monitor one's present state is a  
125 prerequisite for adjusting ongoing thoughts or actions<sup>36</sup>. Therefore, it is plausible to hypothesize  
126 that brain regions in System II suppressed during video watching are the neural substrates of  
127 awareness of one's inner-state. To test this hypothesis, we conducted a heartbeat detection task  
128 requiring the awareness of one's inner-state. We recorded participants' brain activity during these  
129 tasks using functional magnetic resonance imaging (fMRI). An overall study procedure is illustrated



130 in **Figure 1**.

131

132 Our analyses of the fMRI data from the video-watching task demonstrated that the amygdala, a key  
133 region involved in emotional processing within System I, showed significant activation, particularly  
134 when participants were watching videos they liked. In contrast, the control regions within System  
135 II, including the dorsolateral prefrontal cortex (dlPFC), dorsal anterior cingulate cortex (dACC),  
136 anterior insular cortex (aIC), and pre-supplementary motor area (preSMA), exhibited deactivation.  
137 Trait self-control measures were found to correlate with brain activities of these four regions, but  
138 not of the amygdala. In contrast to the video task, the two cognitive tasks significantly activated the  
139 four control regions under the conditions involving inhibitory control, conflict resolution, or rule-  
140 switching. However, no significant correlation between trait self-control and brain activation in  
141 abovementioned control regions under these conditions was found. Next, to better depict the  
142 interplay between System I and System II during video watching, we applied dynamic causal  
143 modelling (DCM) <sup>37</sup> to characterize the effective connectivity between these regions. Our DCM  
144 analysis revealed that the amygdala exerted an inhibitory influence on all the four control regions  
145 during participant's viewing of their preferred videos. In contrast, when participants were viewing  
146 less preferred videos, the dlPFC and dACC down-regulated the amygdala's activation. Lastly, to  
147 test our hypothesis that System II suppressed by video-watching task support awareness of one's  
148 inner-state, we compared the neural responses in the heartbeat detection condition and the control  
149 number-counting condition, and found higher activity of System II in the heartbeat detection  
150 condition. Further, the activation in System II during heartbeat perception positively and  
151 significantly correlated with levels of trait self-control.

152

153 In summary, our results shed light on the neural mechanisms behind the over-viewing behavior of  
154 short videos from the perspective of interaction between the two systems of self-control, and provide  
155 valuable insights to promote healthier viewing behaviors.

156

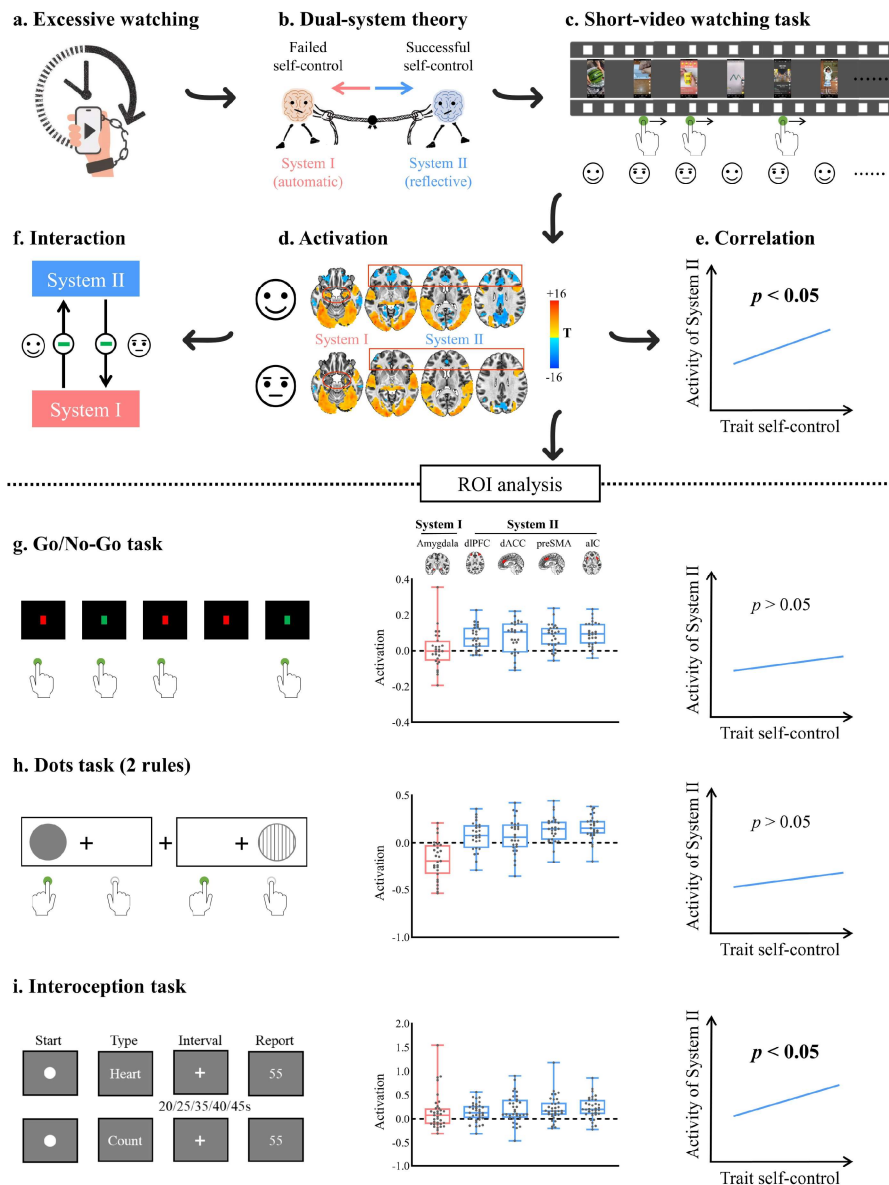

157

158

159

160

161

162

163

164

165

166

167

168

169

170

171

172

**Figure 1 Analysis Flowchart and Result Schematics.** (a) The lack of self-control over short-video watching is a public concern. (b) The dual-system model attributes self-control to the balance between the automatic (System I) and reflective (System II) systems. (c) A novel video-watching task was designed to characterize brain activity during the viewing of preferred and less-preferred content. (d) General linear modelling revealed that video-watching activated System I (marked with red circles) while deactivating System II (marked with red rectangles). (e) The brain activity of System II regions during watching short-videos correlated with trait self-control. (f) Dynamic causal modelling revealed that in the face of preferred content, System I inhibited System II. Conversely, when facing less-preferred content, System II down-regulated System I. (g) Regions of interest (ROIs) analysis for the Go/No-Go task showed significant activation of System II during the response inhibition process, but no correlation with self-control. (h) The Dots task, demanding cognitive flexibility to switch between two rules, deactivated System I and activated System II, but showed no correlation with trait self-control. (i) An interoception task requiring inner-state awareness of heartbeat activated both systems, and the System II activity during heartbeat perception significantly correlated with trait self-control.

## 173 Results

### 174 Different measures of trait self-control were significantly correlated

175 Trait self-control is a multifaceted construct that can be measured in various ways. In our study, we  
176 used three well-established questionnaires to measure different aspects of trait self-control,  
177 including general self-control, impulsiveness, and mindfulness. Our results showed significant  
178 correlations between these different measures. Specifically, general self-control was negatively  
179 correlated with impulsiveness ( $r = -0.692, p < 0.001$ ) and positively correlated with mindfulness ( $r$   
180  $= 0.493, p = 0.009$ ), with the latter two negatively correlating with each other ( $r = -0.625, p < 0.001$ ).  
181 These correlations remained significant after controlling for age, gender, anxiety, and depression,  
182 except for the correlation between general self-control and mindfulness ( $r = 0.370, p = 0.082$ ).

183

### 184 Weak relations between trait self-control and behavioral performances of laboratory cognitive 185 tasks

186 Motivated by the traditional assumption in the literature that individuals with higher trait self-control  
187 might perform better on tasks requiring high cognitive control, we also explored how self-reported  
188 self-control related to cognitive control abilities measured using laboratory tasks. We used the  
189 Go/No-Go task, which measures the ability to inhibit prepotent motor responses (inhibitory control),  
190 and the Dots task, which assesses the ability to monitor and resolve conflict (conflict monitoring  
191 and resolution) and switch between different task rules (cognitive flexibility). While previous  
192 findings on the correlation between trait self-control and cognitive control task performance are  
193 mixed, we found the relationships between trait self-control and cognitive control measures with  
194 relatively small effect size. Specifically, only the cognitive control measured by the mean response  
195 times in the Mixed condition of the Dots task was significantly related to general self-control ( $r =$   
196  $0.424, p = 0.044$ ) and impulsiveness ( $r = -0.455, p = 0.029$ ). The other correlations were not  
197 significant ( $p > 0.05$ ). Detailed information about performance in the cognitive control tasks and  
198 their relationships with trait self-control is presented in Table S2.

199

### 200 Voxel-wise analyses showed the activation of amygdala in System I and the deactivation of 201 prefrontal cortex in System II during watching short-videos

202 Next, we sought to investigate the associations between trait self-control and neural activities from  
203 a dual-system perspective. We designed a naturalistic short-video watching task that allowed  
204 participants to choose which videos to watch based on their personal preferences, without any  
205 external rules constraining their choices. The videos were categorized into Like and Dislike groups  
206 according to each participant's choices. Videos that participants watched from beginning to end were  
207 categorized as Like videos (average portion = 35.2%), while those that participants watched less  
208 than 50% of were classified as Dislike videos (average portion = 46.2%).

209

210 Using voxel-wise general linear modelling, we examined the brain activity associated with both  
211 Like and Dislike conditions and compared their activation patterns (**Figure 2**, corrected  $p < 0.05$ ).  
212 In both conditions, visual cortex, auditory cortex, and middle temporal lobe were activated, whereas  
213 posterior cingulate cortex, precuneus, inferior parietal cortex, and cerebellum were deactivated  
214 (**Figure 2a** and **2b**, one-sample t-test).

215

216 A paired-sample t-test was used to assess the statistical differences between the two conditions.  
 217 Results showed that, amygdala (a key region in System I), middle temporal cortex, and dorsal  
 218 attention network (intraparietal sulcus and frontal eye fields) were activated in a higher extent in the  
 219 Like condition (**Figure 2c**). Contrarily, frontal regions in System II, including dlPFC (BA 9,46),  
 220 dACC (BA 32,24), preSMA (BA 6), and aIC showed significant differential activation between the  
 221 Like and Dislike conditions. Specifically, these regions were deactivated in the Like condition, but  
 222 such deactivation was less pronounced in the Dislike condition, with preSMA and aIC even  
 223 exhibiting positive activation (**Figure 2c**). Except for these frontal regions, posterior cingulate  
 224 cortex and precuneus also showed similar between-condition difference (see supplementary Table  
 225 S1).

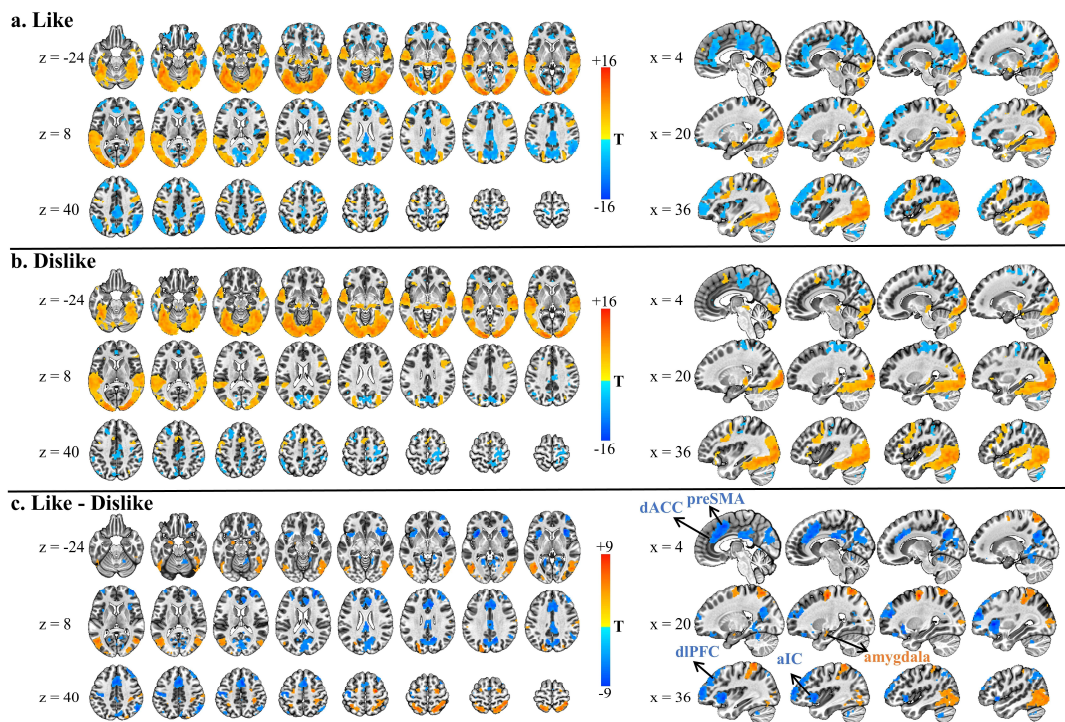

226  
 227 **Figure 2 Activation Maps of Group-level Analysis in the Video-watching Task ( $p < 0.05$**   
 228 **corrected).** (a) Activation for Like relative to fixation baseline. (b) Activation for Dislike relative  
 229 to fixation baseline. (c) Contrast of “Like > Dislike”. As illustrated in (c), the amygdala, a key region  
 230 of automatic System I, displayed heightened activation whereas prefrontal regions including dACC,  
 231 preSMA, dlPFC and aIC, in the reflective System II showed pronounced suppression when viewing  
 232 preferred video content (i.e., in the Like condition). Abbreviations: dACC, dorsal anterior cingulate  
 233 cortex; preSMA, pre-supplementary motor area; dlPFC, dorsolateral prefrontal cortex; aIC, anterior  
 234 insular cortex.

236 **ROI-wise analyses revealed the deactivation of System I and the activation of System II during**  
 237 **cognitive control tasks**

238 In the video-watching task, participants freely selected videos based on personal preference. In  
 239 contrast, traditional cognitive tasks require rule-based information processing. To contrast neural  
 240 activation patterns with traditional cognitive tasks, we focused on five regions of interest (ROIs).  
 241 The amygdala, a central region of System I, and four key regions of System II—dlPFC, aIC, dACC,  
 242 and preSMA—were selected (**Figure 3**, for a more detailed justification, please refer to *Methods*

243 and supplementary Figure S3). We then extracted brain activation data from each region for each  
244 condition in the Go/No-Go and Dots tasks for statistical analysis.

245

246 Contrasting to its positive activation during video watching, the amygdala was predominantly  
247 suppressed, particularly in the Mixed condition of the Dots task, where rule-switching was required.  
248 This distinction highlights the amygdala's varied roles in self-directed video-watching versus rule-  
249 driven cognitive tasks.

250

251 For the regions in System II, two distinct activation patterns emerged across various task conditions.  
252 Specifically, dlPFC and dACC showed one pattern: deactivation during the viewing of Like videos  
253 (dlPFC:  $t = -7.69$ ,  $p < 0.001$ , Cohen's  $d = 1.48$ ; dACC:  $t = -6.95$ ,  $p < 0.001$ , Cohen's  $d = 1.34$ ), near  
254 baseline activation when viewing Dislike videos (dlPFC:  $t = -0.74$ ,  $p = 0.48$ , Cohen's  $d = 0.14$ ;  
255 dACC:  $t = -0.29$ ,  $p = 0.78$ , Cohen's  $d = 0.19$ ), positive activation in the NoGo condition of the  
256 Go/No-Go task (dlPFC:  $t = 6.09$ ,  $p < 0.001$ , Cohen's  $d = 1.17$ ; dACC:  $t = 3.28$ ,  $p = 0.003$ , Cohen's  
257  $d = 0.63$ ), and a non-significant trend of deactivation in the Dots task. This pattern suggests that  
258 dlPFC and dACC suppressed during preferred video viewing are the neural substrates for rule-  
259 guided response inhibition.

260

261 In contrast, the preSMA and aIC exhibited another pattern. These two regions were significantly  
262 deactivated when viewing Like videos (preSMA:  $t = -4.14$ ,  $p < 0.001$ , Cohen's  $d = 0.80$ ; aIC:  $t = -$   
263  $4.42$ ,  $p < 0.001$ , Cohen's  $d = 0.85$ ) and significantly activated when viewing Dislike videos (preSMA:  
264  $t = 2.99$ ,  $p = 0.006$ , Cohen's  $d = 0.58$ ; aIC:  $t = 2.58$ ,  $p = 0.016$ , Cohen's  $d = 0.50$ ). In the Go/No-Go  
265 task, both regions demonstrated positive activation in both Go and NoGo conditions, with a more  
266 pronounced activation in the NoGo condition (preSMA:  $t = 5.85$ ,  $p < 0.001$ , Cohen's  $d = 1.13$ ; aIC:  
267  $t = 7.31$ ,  $p < 0.001$ , Cohen's  $d = 1.41$ ). In the Dots task, these regions showed significantly higher  
268 activation in the Mixed condition, compared to both Congruent and Incongruent conditions  
269 (preSMA:  $F = 16.19$ ,  $p < 0.001$ , partial  $\eta^2 = 0.38$ ; aIC:  $F = 35.37$ ,  $p < 0.001$ , partial  $\eta^2 = 0.58$ ).  
270 Notably, despite the positive activation in the Go condition of the Go/No-Go task, these regions  
271 displayed neither activation nor deactivation in the Congruent (preSMA:  $t = 1.53$ ,  $p = 0.14$ , Cohen's  
272  $d = 0.29$ ; aIC:  $t = -2.24$ ,  $p = 0.034$ , Cohen's  $d = 0.43$ ) and Incongruent conditions (preSMA:  $t = 1.56$ ,  
273  $p = 0.13$ , Cohen's  $d = 0.30$ ; aIC:  $t = 0.47$ ,  $p = 0.64$ , Cohen's  $d = 0.09$ ) of the Dots task. This pattern  
274 implies that the preSMA and aIC, when suppressed during preferred video viewing, play an  
275 important role in cognitive flexibility, particularly in transitioning to alternate response rules or  
276 affective states.

277



290 **Trait self-control was robustly related to the activity of System II during video task but not**  
 291 **during Go/No-Go and Dots tasks**

292 Given that self-control primarily pertains to one’s ability to voluntarily adjust their internal thoughts,  
 293 emotions, and behaviors, we proceeded to investigate whether brain activation during a more  
 294 naturalistic task, such as watching videos, would correlate more closely with trait self-control.  
 295

296 In the Dislike condition, the activities of the four ROIs in System II were significantly related to  
 297 general self-control, mindfulness, and impulsiveness (**Table 1**). In the Like condition, while the  
 298 dlPFC activation was moderately related to general self-control and impulsivity, activities of all the  
 299 four regions were significantly and positively related to mindfulness (**Table 1**). However, no  
 300 significant correlation was found between trait self-control and amygdala activity in either Like or  
 301 Dislike conditions.  
 302

303 To test the specificity of video task in the brain-behavioral associations, we conducted a  
 304 complementary analysis on the correlation between trait self-control and brain activation in the  
 305 Go/No-Go and Dots tasks. Only the dACC activity in the Go/No-Go task showed a significant and  
 306 negative correlation with impulsivity ( $r = -0.545, p = 0.007$ ). Aside from this, we did not find any  
 307 significant relationship between neural activities of two systems and general self-control,  
 308 impulsivity, or mindfulness (**Table 1**).  
 309

310 **Table 1. Statistical information of neural activities of five ROIs from two systems across**  
 311 **tasks**

| Tasks          | Conditions              | Regions  | Activation (beta value) |      |        | Partial Correlation |            |          |
|----------------|-------------------------|----------|-------------------------|------|--------|---------------------|------------|----------|
|                |                         |          | M                       | SD   | T-test | BSCS                | BIS-11     | FFMQ     |
| Video-watching | Dislike                 | amygdala | 0.14                    | 0.20 | 3.73   | -0.109              | 0.075      | 0.035    |
|                |                         | dlPFC    | -0.03                   | 0.21 | -0.74  | 0.657 ***           | -0.68 ***  | 0.417 *  |
|                |                         | dACC     | -0.02                   | 0.27 | -0.29  | 0.539 **            | -0.565 **  | 0.398    |
|                |                         | preSMA   | 0.14                    | 0.25 | 2.99   | 0.384               | -0.628 **  | 0.467 *  |
|                |                         | aIC      | 0.10                    | 0.20 | 2.58   | 0.55 **             | -0.671 *** | 0.51 *   |
|                | Like                    | amygdala | 0.33                    | 0.21 | 8.30   | -0.257              | -0.049     | 0.104    |
|                |                         | dlPFC    | -0.26                   | 0.18 | -7.69  | 0.42 *              | -0.521 *   | 0.572 ** |
|                |                         | dACC     | -0.31                   | 0.23 | -6.95  | 0.227               | -0.316     | 0.443 *  |
|                |                         | preSMA   | -0.15                   | 0.19 | -4.14  | 0.124               | -0.272     | 0.512 *  |
|                |                         | aIC      | -0.15                   | 0.17 | -4.42  | 0.282               | -0.334     | 0.544 ** |
| Go/No-Go       | NoGo - Go               | amygdala | 0.01                    | 0.11 | 0.39   | -0.156              | 0.259      | -0.24    |
|                |                         | dlPFC    | 0.07                    | 0.07 | 5.67   | 0.39                | -0.378     | 0.069    |
|                |                         | dACC     | 0.07                    | 0.09 | 4.28   | 0.335               | -0.545 **  | 0.412    |
|                |                         | preSMA   | 0.08                    | 0.07 | 5.85   | 0.386               | -0.272     | -0.119   |
|                |                         | aIC      | 0.10                    | 0.07 | 7.31   | 0.195               | -0.368     | -0.162   |
| Dots           | Incongruent - Congruent | amygdala | -0.03                   | 0.33 | -0.51  | 0.057               | -0.141     | -0.196   |
|                |                         | dlPFC    | -0.001                  | 0.19 | -0.04  | 0.078               | -0.16      | 0.044    |
|                |                         | dACC     | 0.005                   | 0.20 | 0.12   | 0.286               | -0.229     | -0.079   |
|                |                         | preSMA   | -0.002                  | 0.12 | -0.10  | 0.229               | -0.127     | 0.109    |
|                |                         | aIC      | 0.07                    | 0.15 | 2.37   | -0.051              | -0.026     | 0.217    |
|                | Mixed - Incongruent     | amygdala | -0.19                   | 0.20 | -4.75  | -0.187              | 0.293      | 0.058    |
|                |                         | dlPFC    | 0.07                    | 0.15 | 2.46   | -0.003              | 0.055      | -0.239   |
|                |                         | dACC     | 0.07                    | 0.18 | 1.89   | -0.187              | 0.322      | -0.035   |
|                |                         | preSMA   | 0.14                    | 0.14 | 5.12   | -0.037              | -0.11      | -0.052   |
|                |                         | aIC      | 0.16                    | 0.13 | 6.45   | 0.178               | -0.024     | -0.172   |

312  
 313 Note: \*  $p < 0.05$ , \*\*  $p < 0.01$ , \*\*\*  $p < 0.001$ . M, mean value; SD, standard deviation; BSCS, Brief Self Control Scale;  
 314 BIS-11, Barratt Impulsiveness Scale; FFMQ, Five Factor Mindfulness Questionnaire. Age, gender, anxiety, and  
 315 depression scores were used as covariates in the partial correlational analysis.



316 To assess the robustness of the observed relationship between self-reported self-control and the  
 317 neural activities of System II under the Dislike condition, we conducted a leave-one-out cross  
 318 validation analysis. Our results suggest that regional activities of System II in the Dislike condition,  
 319 with four additional variables (i.e., age, gender, anxiety, and depression) as covariates, can provide  
 320 reliable prediction on trait self-control (supplementary Figure S1).

321

### 322 **The interaction between System I and System II during Like vs. Dislike video-viewing**

323 To test the hypothesis that System I would suppress System II during video watching, we utilized  
 324 DCM to elucidate how different video-watching states modulate the interaction between the two  
 325 systems. DCM, a Bayesian-based technique, allows for the estimation of directional interactions  
 326 (i.e., effective connectivity) between brain regions at a neurobiological level. We applied a full  
 327 model (see supplementary Figure S2) to each participant's data and performed a group-level  
 328 Parametric Empirical Bayes (PEB) analysis. Parameters surpassing a posterior probability of 95%  
 329 are depicted in **Figure 4** and supplementary Figure S2.

330

331 Our results delineate a reciprocal excitation/inhibition between amygdala (System I) and the four  
 332 System II regions (i.e., dlPFC, dACC, preSMA, and aIC) under the Like and Dislike conditions.  
 333 During engagement with preferred content in the Like condition, the amygdala, while showing  
 334 excitatory connection with the visual cortex, imposed inhibitory effects on the System II regions to  
 335 varying degrees (negative values in **Figure 4a**, in units of Hz). In contrast, when interacting with  
 336 less preferred content in the Dislike condition, this dynamic was reversed: the amygdala exerted  
 337 excitatory influences on the four System II regions while concurrently receiving inhibitory inputs  
 338 from the dACC and dlPFC (negative values in **Figure 4b**, in units of Hz). In addition, the  
 339 connectivity from aIC to preSMA was increased in the Dislike condition (supplementary Figure  
 340 S2d). These patterns demonstrate a context-dependent excitatory and inhibitory interplay between  
 341 the two systems, depicting a dynamic feature of self-control process in an ever-changing real-life  
 342 environment.

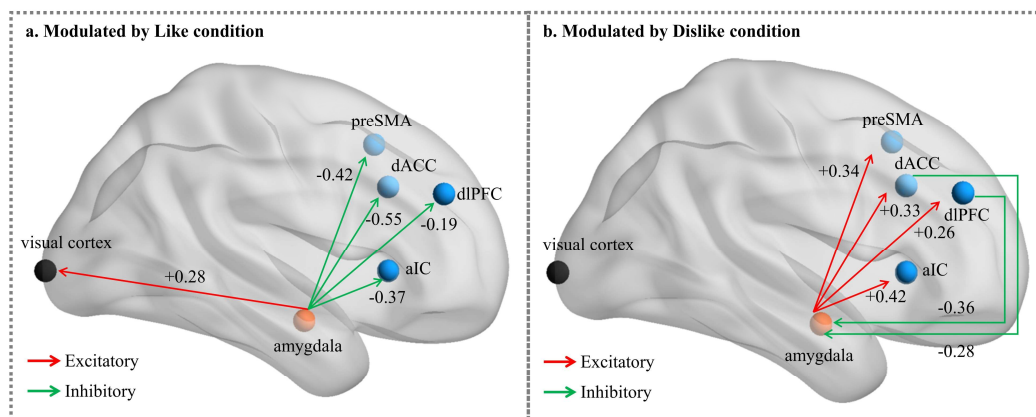

343

344 **Figure 4 Modulatory effects of Like/Dislike Conditions on the Effective Connectivity Between**  
 345 **System I and II, as Estimated by the PEB Group-level Matrix B.** (a) Modulated by the Like  
 346 condition, System I exerted inhibitory effect on System II. (b) Modulated by the Dislike condition,  
 347 System I excited System II but also received inhibitory inputs from System II (primarily the dlPFC  
 348 and dACC). Abbreviations: dlPFC, dorsolateral prefrontal cortex; dACC, dorsal anterior cingulate  
 349 cortex; preSMA, pre-supplementary motor area; aIC, anterior insular cortex.



350

351 **System II was enhanced in the interoception task and its neural activity was significantly**  
352 **correlated with trait self-control**

353 Our hypothesis posits that certain brain regions, suppressed during video watching, support the  
354 awareness of one’s inner state, a crucial precursor to the exertion of self-control. To explore this, we  
355 conducted a heartbeat detection task that required participants to accurately perceive their own  
356 heartbeat during specified time intervals. This task effectively engaged participants’ internal  
357 monitoring systems. We also implemented a control condition that involved number counting, to  
358 separate the influence of mental counting when examining brain activation.

359

360 We first examined the four regions of System II, which were suppressed during the video-watching  
361 task. If these regions truly support the function of inner-state awareness, they should display  
362 increased activation in the heartbeat detection condition, and this activation should correlate  
363 positively with trait mindfulness and self-control. Consistent with this expectation, the ROI analysis  
364 revealed that all the four regions showed increased activity during the heartbeat detection compared  
365 to the control condition (dlPFC:  $t = 4.17, p < 0.001$ , Cohen’s  $d = 0.71$ ; dACC:  $t = 4.14, p < 0.001$ ,  
366 Cohen’s  $d = 0.7$ ; preSMA:  $t = 4.74, p < 0.001$ , Cohen’s  $d = 0.8$ ; aIC:  $t = 5.86, p < 0.001$ , Cohen’s  $d$   
367  $= 0.99$ ; **Figure 5**). Importantly, these activations were positively and significantly correlated with  
368 general self-control and mindfulness (**Figure 5, Table 2**). Such an association was not observed in  
369 the number counting condition.

370

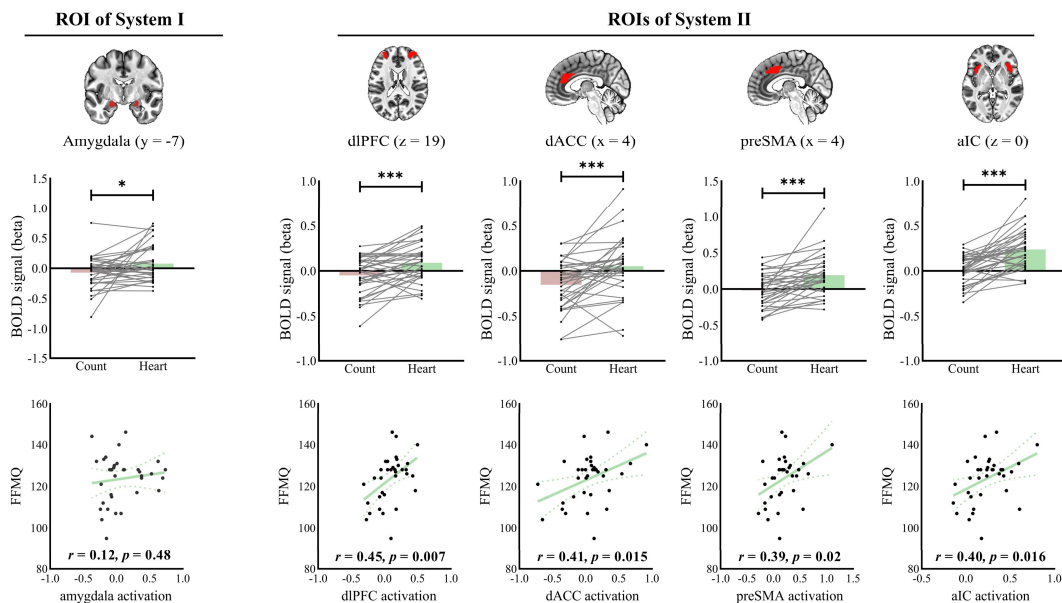

371

372 **Figure 5 ROI-analysis for the Interoception Task.** The top panel’s bar plots display the BOLD  
373 responses distribution of the two systems across conditions. Higher activations were observed in the  
374 heartbeat detection (Heart) condition compared to number counting (Count) condition. Only the  
375 neural activity in the four regions of System II significantly correlated with levels of trait  
376 mindfulness, as measured by the FFMQ score. Individual data points showing activations (beta  
377 values) of the two systems were provided in both bar and scatter plots.

378

379

380 **Table 2. Correlations between trait self-control and brain activation in the interoception task**

| Condition | Regions  | Activation |      |       | Pearson's correlation |        |
|-----------|----------|------------|------|-------|-----------------------|--------|
|           |          | M          | SD   | T     | BSCS                  | FFMQ   |
| Heart     | amygdala | 0.08       | 0.3  | 1.54  | 0.155                 | 0.122  |
|           | dIPFC    | 0.09       | 0.21 | 2.61  | 0.378*                | 0.45** |
|           | dACC     | 0.05       | 0.33 | 0.95  | 0.398*                | 0.409* |
|           | preSMA   | 0.19       | 0.28 | 4.15  | 0.361*                | 0.392* |
|           | aIC      | 0.24       | 0.21 | 6.6   | 0.446**               | 0.404* |
| Count     | amygdala | -0.07      | 0.27 | -1.59 | -0.215                | -0.190 |
|           | dIPFC    | -0.05      | 0.21 | -1.43 | 0.174                 | 0.161  |
|           | dACC     | -0.15      | 0.27 | -3.38 | 0.051                 | 0.088  |
|           | preSMA   | -0.02      | 0.23 | -0.51 | -0.066                | 0.016  |
|           | aIC      | 0.01       | 0.16 | 0.4   | -0.003                | 0.004  |

381

382

Note: \*  $p < .05$ , \*\*  $< .01$ . M, mean value; SD, standard deviation; BSCS, Brief Self Control Scale; FFMQ, Five Factor Mindfulness Questionnaire.

383

384

385 We further probed the response of the amygdala in System I, given its significant activation and  
 386 deactivation during video watching and traditional cognitive tasks, respectively. Interestingly, the  
 387 amygdala maintained a moderate, but significantly higher, level of activation in the heartbeat  
 388 detection condition compared to the control condition ( $t = 2.34$ ,  $p = 0.03$ , Cohen's  $d = 0.4$ ). This  
 389 suggests a unique state distinct from cognitive tasks. However, similar to the observations from the  
 390 video-watching task, the amygdala activation did not correlate with general self-control or  
 391 mindfulness ( $p > 0.05$ ).

392

## 393 Discussion

394 In present study, we found that when participants were viewing their preferred content, the amygdala  
 395 (System I) was activated, while System II regions were deactivated. Conversely, when viewing less  
 396 preferred content, the amygdala was less activated and System II regions were less deactivated. Our  
 397 DCM results further revealed that during preferred content viewing, the amygdala exerted an  
 398 inhibitory influence on the four regions of System II, and two of them (dIPFC and dACC)  
 399 downregulated the amygdala when viewing less preferred content. In addition, the System II regions  
 400 were activated to varying extent in two traditional cognitive tasks and an interoceptive task, but only  
 401 the activation during the interoceptive task correlated with trait self-control. In below sections, we  
 402 discussed the implications of these findings to better understand the worldwide rapid escalation of  
 403 short-video usage, and we proposed a theoretical model from the dual-system perspective to account  
 404 for the neuropsychological processes of video-watching behavior reinforced by AI recommendation.  
 405

### 406 Implications of the activation of system I and deactivation of System II in understanding of 407 video-watching behavior

408 Our findings suggest that the activation of System I, particularly the amygdala, is instrumental in  
 409 shaping the engaging experience of video watching. This concurs with previous literature which  
 410 emphasizes the role of the amygdala in emotional processing and motivation<sup>38</sup>. The amygdala,

411 though has been long studied in the context of negative emotions, also plays a significant role in  
412 positive emotional representation<sup>39</sup> and reward learning<sup>40</sup>. Earlier work indicates a role of  
413 amygdala projections in enhancing sensory processing of emotional stimuli<sup>41,42</sup>. The excitatory  
414 connection from amygdala to visual cortex observed in our study provides empirical evidence for  
415 this notion and suggests that the amygdala may be able to increase attentional allocation toward  
416 stimuli associated with positively valenced experiences, thereby driving continued viewing.

417

418 Even when the content is less appealing, the activation of the amygdala persists, albeit at a reduced  
419 level. This finding further highlights the important role of amygdala in encoding valence and  
420 updating representations of value<sup>40,43</sup>. Previous research has shown the amygdala contains detectors  
421 for both appetitive and aversive stimuli<sup>44</sup>. Moreover, evidence from animal studies reveals an  
422 inhibitory relationship between these positive and negative encoding neurons<sup>45,46</sup>. The amygdala's  
423 putative capacity to represent a spectrum of subjective valences from pleasantness to unpleasantness  
424 may underpin its sustained engagement during continuous short-video viewing, with the activation  
425 level influenced by the interplay between populations of neurons encoding positive versus negative  
426 valence. And such encoding activity could plausibly impact choice selection and decision-making  
427 during media consumption<sup>47</sup>. Further electrophysiological investigation is required to elucidate how  
428 the specific distribution and proportions of these neurons may affect amygdala activation and  
429 accompanying affective state in response to audiovisual stimuli.

430

431 The deactivation of System II during the viewing of preferred content further provides insights into  
432 the top-down mechanisms of video-watching behavior. The dlPFC is known for its involvement in  
433 executive functions such as working memory, cognitive flexibility, planning, inhibition, and abstract  
434 reasoning<sup>48</sup>. The dACC is associated with conflict monitoring and adjusting control levels  
435 accordingly<sup>49</sup>, while the preSMA is involved in changing movement plan and switching<sup>50</sup>. The aIC  
436 is thought to integrate information from diverse functional systems and plays a crucial role in  
437 awareness, attention, and decision-making<sup>51</sup>. It is believed that activation of these regions is  
438 essential for the implementation of specific cognitive processes<sup>52</sup>, and the extent of their activation  
439 is also closely linked to task performance<sup>53</sup>. In other word, if these brain regions displayed a  
440 negative BOLD signal (i.e., deactivated) during a cognitive task, then the functions they support are  
441 disabled or dysfunctional. Therefore, the observed deactivation of these regions during watching  
442 short-videos might contribute to the establishment of a “flow” state, a phenomenon where  
443 individuals are so absorbed in an activity that they lose track of time and their surroundings<sup>54</sup>.  
444 Indeed, previous research has proposed that a flow state is associated with reduced frontal activity  
445<sup>55,56</sup>. Our finding confers preliminary empirical evidence for this theoretical postulation.

446

447 An intriguing phenomenon is that despite the overall deactivation of the control system, there exist  
448 individual variations in the level of inhibition, which correlate with individuals' trait of mindfulness.  
449 That is, individuals with higher level of mindfulness exhibits less inhibition of the control system  
450 when consuming favorite video content, indicating that those individuals might still have a higher-  
451 level of awareness of present-moment experiences when facing tempting stimuli to prevent them  
452 from getting fully absorbed<sup>57</sup>. Such association remains when facing less preferred content evoking  
453 behavioral adjustment, further suggesting that individuals with higher level of dispositional  
454 mindfulness might be more capable to effectively recruit their control system<sup>58</sup>. Given that

455 mindfulness training can improve awareness <sup>59</sup>, we speculate that mindful practices may help to  
456 counteract the deactivation of System II seen during video watching, potentially promoting healthier  
457 video consumption habits with improved self-control abilities.

458

### 459 **The neural anatomic basis of the interplay between system I and II**

460 The interplay between System I and System II during video watching provides a nuanced picture of  
461 how brain systems interact in this prevalent behavior. First, the inhibitory influences from the  
462 amygdala to prefrontal regions, as observed in our study, are supported by a substantial body of  
463 neuroanatomical and electrophysiological evidence. Specifically, the amygdala sends excitatory  
464 projections to the prefrontal cortex, but the overall influence of these inputs is predominantly  
465 inhibitory due to the preferential targeting of inhibitory interneurons within the PFC <sup>60,61</sup>. Moreover,  
466 amygdala's negative correlations with dlPFC, dACC, and aIC have been observed in a recent  
467 resting-state functional connectivity study <sup>62</sup>, which is in line with aforementioned cellular-level  
468 findings. Second, dlPFC and dACC were found to have densely reciprocal connections with the  
469 amygdala <sup>63</sup>. The feedback inhibition from dlPFC and dACC to amygdala align with earlier findings,  
470 as these regions are thought to downregulate the amygdala not only during explicit emotion  
471 regulation but also during cognitively demanding tasks <sup>64,65</sup>. The context-dependent interaction of  
472 amygdala with prefrontal regions in video-watching behaviors might arise from the differentiated  
473 projections from the positive- and negative-encoding neurons in amygdala <sup>66</sup>, but circuitry level  
474 evidence is required to test this conjecture.

475

476 The reciprocal inhibitory interaction between System I and System II contributes to a further  
477 refinement of the dual-system theory. Previous theory depicted their relationship as more of a see-  
478 saw battle <sup>22</sup>, where the two systems compete in terms of activation strength, with the more strongly  
479 activated system determining final action <sup>23</sup>. The inhibition of System II's activity on System I has  
480 been supported, yet the impact of System I's activity on System II remains unclear. Some studies  
481 put forth the hypothesis that heightened activation of System I might override System II,  
482 contributing to the loss of control to resist drugs <sup>67</sup>. Our findings clearly pointed out that the  
483 hyperactivation of System I could suppress System II, going beyond the two-party competition on  
484 activation degree. Theoretically, if current affective stimuli keep System I highly involved, System  
485 II will remain suppressed. Consequently, individuals' long-term goals cannot be represented in  
486 working memory, leading to a lack of prerequisites for regulating their behavior in the moment,  
487 even if it is inappropriate.

488

### 489 **Neuropsychological mechanisms of self-control during short-video viewing**

490 The robust associations between personal trait self-control and brain metrics derived from video  
491 watching task and inner-state monitoring task, but not from the typical cognitive tasks, suggest a  
492 need to reconsider self-control related behaviors from a more ecological perspective. To this end  
493 and predicated on the dual-system theory, we proposed a Capture-Activate-Deactivate-Engage  
494 (CADE) model to account for the surge of short-video watching phenomena by taking the influence  
495 of powerful AI into account (**Figure 6**). This model elucidates the sequential progression of normal  
496 behaviors into problematic behaviors (e.g., unplanned binge-watching) through a series of four  
497 inter-locked stages as below:

498

- 499 • Capture - Attention is reflexively captured by highly salient video stimuli. This bottom-up  
500 capture of attention initiates preferential processing.  
501
- 502 • Activate – The amygdala (System I), as a sensory and emotional processing hub, is activated  
503 to represent momentary emotional valence of the stimulus. If the amygdala’s activation is  
504 insufficient to satisfy one’s emotional expectation, the System II is recruited to disrupt the  
505 viewing process by scrolling to the next one. With such a voluntary selective iteration, the  
506 amygdala is eventually activated high enough to meet the psychologic satisfaction.  
507
- 508 • Deactivate - The heightened activity of amygdala then inhibits prefrontal control regions  
509 (System II) through downstream effects on inhibitory interneurons. This suppresses goal  
510 representations and conflict monitoring functions subserved by these regions, with such a  
511 spectrum of individual difference that individuals with higher level of trait self-control are  
512 more capable to resist this suppression.  
513
- 514 • Engage - With the cumulative effect of an activated System I and a deactivated System II, an  
515 immersed viewing state can be established progressively. While the amygdala activation  
516 accounts for surge of positive affective response that motivates users to consume more short-  
517 videos, the suppression of System II is responsible for a weakened awareness of one’s  
518 goals/plan, preventing ongoing experience being disrupted. As the AI algorithm is able to learn  
519 and recommend content based on each user’s preference, this Capture-Activate-Deactivate-  
520 Engage pathway is then constantly being reinforced, creating a closed-loop.

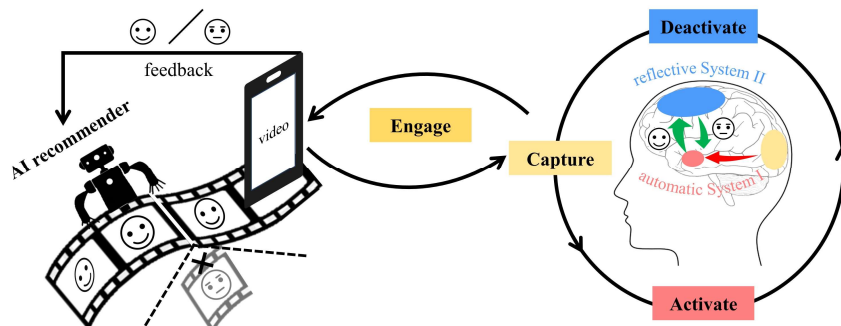

521  
522 **Figure 6 The Capture-Activate-Deactivate-Engage (CADE) Model.** This model proposes four  
523 interlocked steps involving the dynamic interaction between the two systems during watching short-  
524 videos, with bias from recommendation algorithms designed to maximize user engagement. The  
525 process initiates with attentional **Capture** in face of salient video stimuli, which then **Activates**  
526 amygdala (System I) to construct emotional valence representation for subsequent behavioral  
527 choices. When the activation is high enough to meet user’s psychologic satisfaction, the amygdala  
528 **Deactivates** the prefrontal control regions (System II), subsequently weakening the representations  
529 of goals, plans, and self-awareness that rely on the neural activity of this system. Otherwise, an  
530 alternative video is explored until the psychologic satisfaction is achieved. With the cumulative  
531 effect of an activated System I and a deactivated System II, an immersed viewing state can be  
532 established progressively and users **Engage** in video watching. As AI algorithms are able to learn  
533 and recommend content based on each user’s preference, this CADE process is then continually  
534 being reinforced, creating a closed-loop.

535 This CADE model emphasizes the temporal dynamics involved in losing self-control during video  
536 watching. The initial bottom-up capture of attention combined with rapid deactivation of control  
537 regions allows an immersed state to swiftly engage, making voluntary restraint difficult.

538

539 There are several important implications of the CADE model. First, the CADE model highlights  
540 that individuals with less developed control system are likely more vulnerable to losing self-control  
541 during video watching. This predicts greater risk for younger populations like children and  
542 adolescents, whose prefrontal control systems are still maturing<sup>68,69</sup>. Second, prolonged  
543 deactivation of control systems is another critical concern, as the persistent amygdala activation  
544 would activate its downstream interneurons in frontal regions, leading to the suppression of  
545 prefrontal control areas. The prefrontal inhibition, therefore, could be increased by the strengthened  
546 connection between amygdala and frontal interneuron through Hebbian learning principles<sup>70</sup>.  
547 Aligning with this notion, excessive social media use is associated with impaired emotion regulation,  
548 like depression<sup>71</sup>. Given the integrative role of prefrontal cortex in the human brain<sup>72</sup>, careful  
549 examination of how uncontrolled viewing impacts self-control through the interactions between  
550 large-scaled brain network, is warranted. Third, the model highlights the potency of modern AI-  
551 driven tools for maximizing user engagement by continuously activating System I. If not properly  
552 monitored, algorithmic recommendations tailored based on user's behavior might have the potential  
553 to influence democracy, privacy and mental health<sup>73,74</sup>. Policy discussions around ethical  
554 constraints on engagement-maximizing algorithms are urgently needed to promote healthy  
555 technology use, particularly for younger users. Lastly, the positive association between self-control  
556 and activation of control brain regions during monitoring inner state suggests potential benefits of  
557 mindfulness training. The interoceptive awareness and non-judgemental acceptance —two core  
558 elements fostered by mindfulness practice<sup>75</sup> — might be an intrinsic source/power of breaking  
559 the above cycle<sup>76</sup>. By enhancing metacognitive awareness of ongoing thoughts, emotions, and  
560 behaviors, mindfulness may empower individuals to exercise self-control capacities like conflict  
561 monitoring and top-down emotion regulation<sup>77,78</sup>. Further research on how to optimize AI-powered  
562 algorithms to promote engagement in mindfulness practices may hold promise for counteracting  
563 unchecked technology use, offering fruitful new directions.

564

## 565 **Conclusion**

566 Our findings shed new light on the neuropsychological mechanisms underlying self-control during  
567 video watching. First, we revealed the dynamics between System I and System II, with System I  
568 showing heightened activation and System II being suppressed during video watching, suggesting  
569 a lock-down of the control system especially when individuals were viewing their favorite content.  
570 Second, we found that the activation of System II regions during video watching and inner-state  
571 monitoring—but not during traditional cognitive tasks—correlated with self-control abilities,  
572 highlighting the crucial role of voluntary control over rule-based cognitive control in real-world  
573 self-control situations. This result bridges the gap between laboratory cognitive control tasks and  
574 real-world self-control over immediate gratification with a more ecologically valid paradigm. Third,  
575 the opposite effects of video-watching and inner-state mindful awareness on System II collectively  
576 underline the need for further exploration of the application of mindfulness practices in fostering  
577 self-control and healthier digital media use. In short, these findings may inform interventions for  
578 promoting healthier technology use and mitigating potential adverse effects of excessive screen time.

579

580 **Materials and Methods**

581 **Participants**

582 *Sample one*

583 Thirty-two healthy students were recruited to participate in this experiment at Zhejiang University.  
584 Five participants were excluded from analyses (four had too much head motion: maximum > 3mm,  
585 or more than 10% scrubbed volumes with frame-displacement (FD) <sup>79</sup> > 0.5; one disliked all short-  
586 videos). The final sample included 27 participants, with 17 males and 10 females, aged from 18 to  
587 28 years (M = 22.56, SD = 2.28). All participants were right-handed, with normal vision, and  
588 reported no mental disease. Besides, they were experienced users of short-video apps and 23 out of  
589 27 reported that they watched short-videos for more than 30 minutes per day. Participants in this  
590 sample completed a video-watching task and two cognitive tasks (Go/No-Go task and Dots task).

591

592 *Sample two*

593 We recruited another thirty-five students from Zhejiang university to perform an interoception task  
594 in this study (age between 19 and 28 years, M = 23.2, SD = 2.38, 15 male and 20 female). They  
595 were all healthy and reported no interoception-related disease. All participants were included for  
596 analyses.

597

598 All participants signed written informed consent before attending the scanning. Each participant  
599 received monetary compensation for their time and travel. This study was approved by the Ethic  
600 Committee of Zhejiang University.

601

602 **Questionnaires used to measure trait self-control**

603 *Brief Self Control Scale*

604 The Brief Self Control Scale (BSCS) developed by Tangney <sup>17</sup> has been validated to measure  
605 individual difference in general trait self-control. This study used a Chinese version of BSCS revised  
606 by Tan and Guo <sup>80</sup>, which includes 19 items that assess five aspects: impulse control, work  
607 performance, healthy habits, entertainment restraint, and resisting temptation. All items are rated on  
608 a 5-point scale, ranging from 1 (strongly disagree) to 5 (strongly agree). The scores of five sub-  
609 scales were averaged to yield a total score. The higher scores signified greater levels of general trait  
610 self-control. The Cronbach's alpha was 0.82 in our sample.

611

612 *Barratt Impulsiveness Scale*

613 The Barratt Impulsiveness Scale Version 11 (BIS-11) is commonly used to measure the  
614 impulsiveness with 30 items describing impulsive or non-impulsive behaviors and preferences <sup>81</sup>.  
615 We used a well-validated Chinese version <sup>82</sup>, and it had three factors: cognitive impulsiveness, motor  
616 impulsiveness, and lack of planning. Participants were required to rate items from 1 (never) to 5  
617 (always). Higher scores indicated higher impulsive tendency, therefore, lower levels of trait self-  
618 control. The Cronbach's alpha was 0.85 in the present study.

619

620 *Five Factor Mindfulness Questionnaire*

621 The Five Factor Mindfulness Questionnaire (FFMQ) developed by Baer <sup>83</sup>, is a good instrument to  
622 assess individual's trait level of mindfulness. It includes 39 items and taps five aspects of  
623 mindfulness: observing, describing, acting with awareness, nonjudging of inner experience, and

624 nonreactivity to inner experience. Adding all the items' score together yields a total score, and higher  
625 score reflects better mindfulness. The Chinese version used in the present study has been validated  
626 with acceptable psychometric properties<sup>84</sup>. The Cronbach's alpha was 0.79 in the present study.

627

### 628 *Anxiety and Depression*

629 The Brief Symptom Inventory 18 (BSI-18)<sup>85</sup>, a shortened version of the 53-item Brief Symptom  
630 Inventory that was derived from Symptom Checklist-90, is a self-report checklist to measure  
631 psychopathological symptoms in the past week. It includes three dimensions: Somatization (6 items),  
632 Depression (6 items), and Anxiety (6 items). Participants need to rate 18 items based on a 5-point  
633 Likert-scale (0 for "not at all", 1 for "a little bit", 2 for "moderately", 3 for "quite a bit", 4 for  
634 "extremely"). In the present study, we only included Anxiety and Depression subscales and regarded  
635 them as potential control variables when calculating the relations between trait self-control and other  
636 brain measures. The Cronbach's alpha of Anxiety and Depression was 0.79 and 0.88 in our data.

637

### 638 *Short-video watching task*

639 A block design was employed in this task, consisting two 6-minute video-watching blocks and three  
640 30-s rest blocks. A database with a total of 160 videos clips was built in advance. These videos were  
641 recorded from a popular short-video platform, using a newly registered account. An experimental  
642 operator with no history of using short-video apps is responsible for recording with a mobile device  
643 (Model: Xiaomi 9), during which she was instructed to record the short videos recommended by the  
644 platform without any personal bias. After the recording length reached one hour, the recording was  
645 halted. Then the experimenter trimmed the recorded videos and saved them for the final selection.  
646 The videos selected met two requirements: 1) the video content was of an entertaining nature and  
647 contained no violent, bloody, and political content; 2) each video was less than 2 minutes in length.  
648 Considering our samples were young university students, we included five categories of videos in  
649 our final database: single person showing action (e.g., singing, dancing, drawing, cooking, baby  
650 laughing and so on), multiple persons with interaction (e.g., sports, dance, family life, campus life),  
651 pets (mainly cats and dogs), game scenes, and natural scenery. The length of each short-video ranged  
652 from 7s to 104 s (Mean length=23.7s), and there are 130 videos with a duration of less than 30  
653 seconds.

654

655 To simulate the real situation as much as possible when they were watching short videos in daily  
656 life, participants were merely instructed to relax during scanning and were allowed to switch to the  
657 next video clips at any time by pressing a button in their right hand. That meant each participant had  
658 greater autonomy in choosing which videos to watch and when to switch according to their own  
659 interests and preferences. Thus, videos can be naturally categorized as Like if participant kept  
660 watching them until the end, and as Dislike if participants switched before finishing a half. The  
661 videos that have being watched for more than a half but not completely were excluded from analyses.

662

663 The total number of short videos and their play order were predefined, but the actual amount of  
664 visited clips within each 6-minute block varied between participants. The average number of short  
665 videos that participants watched was 67.41 (SD = 13.88, ranging from 42 to 91). The number of  
666 videos were not significantly different between the Liked and Disliked categories ( $M = 35.21$ ,  $SD$   
667  $= 20$ ;  $M = 46.17$ ,  $SD = 15.33$ ;  $t = -1.688$ ,  $p = 0.103$ ). This task took 815 seconds.



668

669 ***Go/No-Go task***

670 An adapted Go/No-Go paradigm developed by Garavan<sup>86</sup> was used and the original stimuli (letter  
671 X and Y) were replaced by colored rectangles (red and green, size: 2cm×1cm) in the present study.  
672 Two conditions were included: 1) only colored rectangles presenting on the black background; 2)  
673 colored rectangles superimposed in the center of phased-scrambled pictures (13cm×6cm) presenting  
674 on the black background. Each condition involves both Go and No-Go trials. Participants were  
675 asked to press a button with the right thumb as quickly as possible when the colors of successively  
676 presenting rectangles were different (Go trials. e.g., red → green, or green → red), whereas to  
677 withhold the response if the colors did not change (No-Go trials. e.g., red → red, or green → green).  
678 Each rectangle was presented on the dark background for 800ms followed by a 200ms inter-stimulus  
679 interval. There were four blocks in this task and each block (80 trials) was followed by a 10s duration  
680 fixation cross. Among the total 320 trials, we set 44 No-Go trials therefore the ratio of No-Go trials  
681 to Go trials was 0.16:1. The reaction time on Go trials was calculated to measure motor execution  
682 and the rate of commission errors (i.e., failing to stop) on No-Go trials was used as an index for  
683 inhibition. The scan time for this task was 380 seconds.

684

685 ***Dots task***

686 The Dots task was first developed by Davidson et al<sup>87</sup>, and we adapted a block-designed version  
687 used by Wang et al<sup>88</sup>. In this task, three conditions were designed and participants were instructed  
688 to press button with their right or left thumb to make response to either a gray or stripped dot  
689 according to different rules. In the Congruent condition, only one type of dots (e.g., gray dots) were  
690 randomly presented on the left or right side of a central fixation, and participants needed to press  
691 spatially congruent buttons with corresponding thumbs. In the Incongruent condition, only the other  
692 type of dots (e.g., stripped dots) were appeared and participant should make side-incongruent  
693 responses. In the Mixed condition, both rules above were intermixed so it required participants to  
694 press buttons in response to two types of dots flexibly. Each condition consisted of three blocks, and  
695 each block lasted 26s, following a 12s fixation. The total trials in each condition were 36. To  
696 eliminate the fixed effect of certain rule, half of participants were asked to treat gray dots as  
697 congruent mark and treat stripped dots as incongruent mark; and the other half were trained with  
698 the reversed rules. For more details of task design, please see<sup>88</sup>. In general, the incongruent  
699 condition has a greater demand on conflict monitoring and resolution than the congruent condition.  
700 The mixed condition has a greater demand on switching between different task sets compared to the  
701 incongruent condition. The mean reaction time and accuracy of correct trials in each condition was  
702 calculated to measure task performance. Considering the anticipatory response, we excluded trials  
703 with RT shorter than 200 ms before calculation. The duration of this task was 375 seconds.

704

705 ***Interoception task***

706 An inner-state tracking paradigm was used to assess the ability to monitor one's present inner state  
707<sup>89</sup>. There are two conditions in this task: 1) Heartbeat Counting (Heart), where participants were  
708 instructed to accurately detect and count their heartbeats over varied time intervals; and 2) Mental  
709 Counting (Count), wherein to control for the effects of mental counting on brain activity,  
710 participants were instructed to count numbers silently at a speed of 1 per second over the same  
711 intervals in the Heart condition, without attending to their heartbeat. A block design was employed,

712 with both the Heart and Count conditions consisting of five blocks. The duration for heartbeat  
713 detection/counting varied across intervals of 20, 25, 35, 40, and 45 seconds, followed by a response  
714 window. Within each condition, the sequence of these durations was randomized. In each block of  
715 the Heart condition, a cue word “Heart” was presented for 3s. Subsequently, as the cue word was  
716 replaced by a fixation, participants began perceiving and counting their heartbeats. This fixation  
717 remained on the screen for the specified duration of the block, after which it was replaced by the  
718 number “55”. Participants reported their heartbeats by pressing 4 buttons to adjust the two “5” digits  
719 by an increase or decrease of 1. In the Count condition, the cue word was changed to “Count” and  
720 participants were instructed to count numbers. The Heart and Count conditions were presented  
721 alternatively. A fingertip blood pressure monitor (compatible with the Siemens 3.0-T scanner) was  
722 put on the participant’s left index fingers to record their heart rate during the task to verify that the  
723 participants follow the instruction.

### 724 725 **Experimental procedure**

726 For both samples, participants were given a tutor about the whole experimental procedure and  
727 signed the consent form upon arrivals. In the first sample, participants completed questionnaires  
728 first. Then, a training session was provided to help them understand the rules of each task with  
729 practice. Specifically, for the short-video watching task, participants were instructed to choose the  
730 videos to watch using the button on their right hand. For Go/No-Go and Dots tasks, participants  
731 performed practices and only with accuracy greater 85% could they move forward to formal testing.  
732 Another practice chance would be provided if participants failed. If the accuracy rate in the second  
733 practice session was still below 85%, we inquired about the participant’s state, reiterated the task  
734 rules, and asked them to practice for a third time. In our sample, there was only one participant who  
735 needed three practice sessions for the Go/No-Go task. In the scanner, participants underwent an 8-  
736 minute resting-state scan and then the short-video task, Go/No-Go task, and Dots task in order. For  
737 participants in the second sample, they practiced on the Heart and Count conditions and learn to use  
738 the four buttons for report outside the scanner and underwent a resting-state scan and then the  
739 interoception task inside the scanner. The questionnaires were completed after scanning for the  
740 second sample. All the resting-state data were not analyzed in the present work.

741  
742 All stimulus presentation and response acquisition were performed within the E-Prime 3.0  
743 environment (Psychology Software Tools, Inc., Pittsburgh, PA). Stimuli were presented through an  
744 MRI compatible screen with 720× 1280 pixels resolution. Foam padding were used to limit head  
745 movement, and noise-cancelling headphones were provided to reduce scanner noise for participants.

### 746 747 **Image data acquisition**

748 Brain imaging data were collected in a Siemens 3.0-T scanner (MAGNETOM Prisma, Siemens  
749 Healthcare Erlangen, Germany) with a 20-channel coil. Structural images were acquired with a T1-  
750 weighted magnetization prepared rapid gradient echo sequence (TR = 2300 ms, TE = 2.32 ms, voxel  
751 size =  $0.90 \times 0.90 \times 0.90$  mm<sup>3</sup>, voxel matrix =  $256 \times 256$ , flip angle = 8°, field of view =  $240 \times$   
752 240). Functional images were collected using a gradient echo planar imaging sequence with multi-  
753 band acceleration (factor = 4, TR = 1000 ms, TE = 34 ms, voxel size =  $2.50 \times 2.50 \times 2.50$  mm<sup>3</sup>,  
754 voxel matrix =  $92 \times 92$ , flip angle = 50°, field of view = 230 mm, slices number = 52).

756 **Image preprocessing**

757 The fMRI data were pre-processed using AFNI<sup>90</sup> with common routines including slice timing,  
758 head motion correction, normalization, and smoothing (FWHM= 5mm). The segmentation was  
759 conducted to extract brains using SPM12 (<https://www.fil.ion.ucl.ac.uk/spm/>). Structural and  
760 functional images were normalized to the MNI space using ANTs (<http://stnava.github.io/ANTs/>).

761

762 **First level general linear modelling (GLM)**

763 The GLM was conducted to estimate the brain response to each task condition, using the command  
764 3dDeconvolve in AFNI.

- 765 • For the video-watching task, three block regressors, namely Like, Dislike, and ‘Unclassified’,  
766 were constructed to characterize the brain responses to videos being viewed to the end, being  
767 switched before half, and being switched after half, respectively. The onset times were the  
768 times when the video appeared on the screen and the durations were the lengths of the video  
769 being viewed. As the participants made button presses under Dislike and Unclassified  
770 conditions, two event-related regressors were constructed to account for the fMRI signal  
771 changes associated with motor responses in the two conditions. Brain responses to Dislike and  
772 Like conditions during the viewing period and their contrast were of the primary interest for  
773 this task.
- 774 • For Go/No-Go task, four event-related regressors were created for successful Go trials,  
775 successful NoGo trials, failed Go trials, and failed NoGo trials. The main contrasts of interest  
776 were the brain responses to the correct NoGo (abbr. as NoGo), the correct Go (abbr. as Go)  
777 conditions and their difference.
- 778 • For the Dots task, three block-wise regressors were created for the Congruent, Incongruent,  
779 and Mixed conditions.
- 780 • For the interoception task, two block-wise regressors were constructed for the Heart and Count  
781 conditions when participants making heartbeat or number counting, respectively. Four event-  
782 related regressors were created to capture the transient response (onset of each operation cue)  
783 at the start and end of each block, separately for the two conditions. The two block-wise  
784 regressors and their contrast were of the primary interest in the present work.

785

786 In addition to the task related regressors, regressors of nuisance, including 6 head motion parameters,  
787 signal drifts (automatically determined with the option -polort A in 3dDeconvolve command) in all  
788 the tasks. As signals from CSF and WM have been shown to contain physiology noise (e.g., heart  
789 rate and respiration)<sup>91</sup>, the first five components of CSF and WM were included as confounds for  
790 all the tasks except for the interoception task as this task required heartbeat perception.

791

792 **Whole brain voxel-wise analyses at the group level for the video task**

793 For the video-watching task, one sample t-tests were conducted to identify brain activation  
794 associated with each condition, and a paired two-sample t-test was used to compare the differences  
795 between conditions of Like and Dislike. Multiple comparison correction was accomplished using  
796 the 3dClustSim mixed-model autocorrelation function (ACF) in AFNI. A corrected significance  
797 level of  $p < .05$  could be achieved with a minimum cluster size of 30 voxels when the threshold was  
798 set at  $p < .001$ .

799

## 800 **ROI analyses on System I and II**

801 To further characterize the neural activities of key brain regions modulated by video task in different  
802 context, a region of interest (ROI) approach was adopted to analyze the two cognitive control tasks  
803 (i.e., Go/No-Go and Dots) the interoception task. Based on our hypothesis on System I and II, we  
804 focused on the activity and interaction of two systems. Therefore, the amygdala regions showing  
805 activation difference between Like and Dislike condition were selected to represent System I.  
806 Similarly, the dlPFC, dACC, preSMA, and aIC were selected as four vital regions in System II based  
807 on the activation difference between the two conditions in the video task, with a reference to a meta-  
808 analysis result with the term of “control” in Neurosynth (supplementary Figure S3,  
809 <https://neurosynth.org/analyses/terms/control/>).

810  
811 More specifically, a binary mask was saved from the contrast activation map (Like > Dislike,  
812 corrected  $p < 0.05$ ). The saved mask was: 1) multiplied with the Brodmann’s area 9 and 46 to create  
813 the mask for dlPFC ROI; 2) multiplied with the Automated anatomical labelling atlas (AAL 90)<sup>92</sup>  
814 masks for cingulate (labelled 31 and 32) to create the dACC ROI; 4) multiplied with AAL masks  
815 labelled 33 and 34 to create the preSMA ROI. The masks of amygdala and aIC from task activation  
816 map were directly taken as corresponding ROIs as they were well constrained within the AAL masks  
817 for amygdala and insula. Mean beta values of these ROIs were extracted from each condition for  
818 each of the three tasks for each participant, and were used in below statistical analyses.

819  
820 One-sample t-tests were used to examine each ROI’s activation under each condition across tasks.  
821 Paired-sample t-test was conducted to compare the activation difference between Go and No-Go  
822 trials for the Go/No-go task. One-way repeated ANOVAs were conducted to compare the beta values  
823 among the three conditions in the Dots task. Correlations between the beta values of the five ROIs  
824 and self-reported self-control scores from BSCS, BIS-11, and FFMQ were examined, controlling  
825 for age, gender, anxiety and depression scores. Group level mean value and individual data points  
826 were used for plotting bar graph (**Figure 3**). Statistical analyses of behavioral and imaging data were  
827 performed using SPSS (version 22.0, <https://www.ibm.com/analytics/spss-statistics-software>) and  
828 JASP (version 0.18.0, <https://jasp-stats.org/>).

## 829 830 **Dynamic Causal Modelling (DCM)**

831 DCM can be used to delineate neuronal dynamics through bilinear approximations<sup>37</sup>, usually in  
832 terms of effective connectivity between regions of interest. Therefore, we implemented the DCM, a  
833 toolbox implemented in SPM 12 (<https://www.fil.ion.ucl.ac.uk/spm/software/>), to characterize the  
834 interaction between the two systems, using a deterministic, one-state model for fMRI. This model  
835 depicts the derivative of neural state at any given time as a function of the current state ( $z$ ), the  
836 experimental input ( $u$ ), and parameters that determine the strength of connections within and  
837 between brain regions:

$$838 \quad \frac{dz}{dt} = Az + \sum_{j=1}^m u_j B^j z + Cu$$

839 where the matrix A represents endogenous connections that are not affected by external input,  
840 including inhibitory self-connection and between-region connections; the matrix B is the  
841 modulatory effect exerted by experimental manipulations on the connectivity; and the matrix C

842 stands for the direct effect on each region due to driving inputs.

843

#### 844 *VOI definition and timeseries extraction*

845 Following previous work <sup>93</sup> and the DCM guide <sup>94</sup>, five regions in the right hemisphere of the brain  
846 were selected as volumes of interest (VOI) from the video-watching task for subsequent DCM  
847 analysis, with a two-step selection procedure detailed below. The first step was to define VOI at the  
848 group level. Specifically, group level peak voxels were identified for five cortical regions as below.  
849 1) the group-level coordinate of peak voxel in visual cortex (MNI:  $x = 14.5$ ,  $y = -100$ ,  $z = 1$ ) from  
850 the main effect of task (watching video clips vs. rest) was identified as the information input node  
851 of the DCM network. 2) the dACC (MNI:  $x = 4.5$ ,  $y = 22.5$ ,  $z = 31$ ), 3) preSMA (MNI:  $x = 2$ ,  $y =$   
852  $17.5$ ,  $z = 46$ ), 4) aIC (MNI:  $x = 32$ ,  $y = 22.5$ ,  $z = 1$ ), and 5) dlPFC (MNI:  $x = 39.5$ ,  $y = 42.5$ ,  $z =$   
853  $28.5$ ) were identified as the peak voxel from contrast of Like > Dislike. Considering the complex  
854 anatomy and small volume of amygdala (relative to cortex), an amygdala mask from meta-analysis  
855 (<https://neurosynth.org/analyses/terms/amygdala/>) (setting  $z$  above 30) was used for individualized  
856 signal extraction in the second step detailed below. The second step was to extract signals from  
857 individualized VOI, constrained by the group level VOI. Specifically, for every subject, a peak voxel  
858 was first searched within a distance of 8 mm from the group peak coordinate, and then voxels within  
859 a 4-mm-radius sphere centered at the peak coordinate were included into the final VOI used in DCM  
860 if the voxel showed a threshold of  $p < 0.05$  for the effect of interest. The threshold was allowed to be  
861 even more liberal if no voxel was found <sup>94</sup>. The effects of no interest (nuisance regressors), including  
862 the motor responses and movements, were regressed out by adjusting a F-contrast, and the first  
863 principal eigen-variate time series of each ROI was extracted.

864

#### 865 *Specification of the model*

866 First, a full model was set for each participant. The visual cortex was assumed to have bidirectional  
867 connection with amygdala <sup>95</sup>, and the other five regions were all bidirectionally connected. The  
868 “task”, including all visual stimuli during watching video clips, was set as a single driving input on  
869 visual cortex only. Like and Dislike both functioned as modulatory input on all possible connectivity  
870 specified in the matrix A, except for the intrinsic self-inhibition of visual area. Without applying the  
871 mean-centred option to experimental input, the A matrix here represented the connectivity of  
872 baseline (fixation).

873

#### 874 *Model estimation*

875 Then, this model was inverted using Variational Laplace to evaluate the quality of the model and  
876 obtain a probability density over parameters. After completion of this estimation process, we  
877 checked each subject’s explained variance and identified five of them with relatively poor explained  
878 variance (below 10%). We excluded them in subsequent group-level analysis based on the previous  
879 technique paper regarding the application of DCM <sup>94,96</sup>.

880

#### 881 *Group-level analysis*

882 Next, Parametrical Empirical Bayes (PEB) was implemented to quantify the group mean of  
883 connection strength and the differences across subjects <sup>97</sup>. The covariate of interest (i.e., the group  
884 mean) was included in the first column of design matrix X, and anxiety, depression, age, and gender  
885 were also added as nuisance covariates. All of these five regressors were mean-centered. Without a

886 prior knowledge of how would the connectivity be modulated by Like and Dislike input, the auto-  
887 search Bayesian model reduction (BMR) routine was applied to select the best model. Three  
888 separate PEB (A, B, and C) analyses were carried out, using greedy search to iteratively prune  
889 parameters that did not contribute to the model evidence from the full PEB model. Then parameters  
890 were further averaged using the Bayesian model averaging (BMA), and only parameters with a  
891 posterior probability > 95% were reported.

892

### 893 **Acknowledgment**

894 This research was supported by the STI 2030 Major Projects (No. 2021ZD0200409); National  
895 Natural Science Foundation of China (No. 81971245, 62077042); the Zhejiang Province “Qianjiang  
896 Talent Program”, and the MOE Frontiers Science Center for Brain Science & Brain-Machine  
897 Integration, Zhejiang University.

898

### 899 **Data availability**

900 Due to ongoing utilization of the raw fMRI data in other analyses, full disclosure of it is currently  
901 not feasible. However, it is available upon request by contacting the corresponding author (email  
902 address: huyuzheng@zju.edu.cn).

903

904 **References**

- 905 1. Zhang, X., Wu, Y. & Liu, S. Exploring short-form video application addiction: Socio-technical  
906 and attachment perspectives. *Telematics and Informatics* **42**, 101243 (2019).
- 907 2. China Internet Network Information Center (CNNIC). The 51st Statistical Report on China's  
908 Internet Development.  
909 <https://www.cnnic.com.cn/IDR/ReportDownloads/202307/P020230707514088128694.pdf>.  
910 (accessed on 10 August 2023)
- 911 3. Salman Aslam. TikTok by the Numbers: Stats, Demographics & Fun Facts.  
912 <https://www.omnicoreagency.com/tiktok-statistics/>. (accessed on 10 August 2023)
- 913 4. Zhao, Z. Analysis on the “Douyin (TikTok) Mania” Phenomenon Based on Recommendation  
914 Algorithms. *E3S Web Conf.* **235**, 03029 (2021).
- 915 5. Hasan, M. R., Jha, A. K. & Liu, Y. Excessive use of online video streaming services: Impact of  
916 recommender system use, psychological factors, and motives. *Computers in Human Behavior*  
917 **80**, 220–228 (2018).
- 918 6. Su, C. *et al.* Viewing personalized video clips recommended by TikTok activates default mode  
919 network and ventral tegmental area. *NeuroImage* **237**, 118136 (2021).
- 920 7. Peng, C., Lee, J.-Y. & Liu, S. Psychological phenomenon analysis of short video users' anxiety,  
921 Addiction and Subjective well-being. *International Journal of Contents* **18**, 27–39 (2022).
- 922 8. Chao, M., Lei, J., He, R., Jiang, Y. & Yang, H. TikTok use and psychosocial factors among  
923 adolescents: Comparisons of non-users, moderate users, and addictive users. *Psychiatry*  
924 *Research* **325**, 115247 (2023).
- 925 9. Xu, Z., Gao, X., Wei, J., Liu, H. & Zhang, Y. Adolescent user behaviors on short video  
926 application, cognitive functioning and academic performance. *Computers & Education* **203**,

- 927 104865 (2023).
- 928 10. Chen, Y., Li, M., Guo, F. & Wang, X. The effect of short-form video addiction on users’  
929 attention. *Behaviour & Information Technology* 1–18 (2022).
- 930 11. Özdemir, Y., Kuzucu, Y. & Ak, Ş. Depression, loneliness and Internet addiction: How important  
931 is low self-control? *Computers in Human Behavior* **34**, 284–290 (2014).
- 932 12. Ford, J. A. & Blumenstein, L. Self-Control and Substance Use Among College Students.  
933 *Journal of Drug Issues* **43**, 56–68 (2013).
- 934 13. Baumeister, R. F., Vohs, K. D. & Tice, D. M. The Strength Model of Self-Control. *Curr Dir*  
935 *Psychol Sci* **16**, 351–355 (2007).
- 936 14. Enkavi, A. Z. *et al.* Large-scale analysis of test–retest reliabilities of self-regulation measures.  
937 *Proc. Natl. Acad. Sci. U.S.A.* **116**, 5472–5477 (2019).
- 938 15. Moffitt, T. E. *et al.* A gradient of childhood self-control predicts health, wealth, and public  
939 safety. *Proc. Natl. Acad. Sci. U.S.A.* **108**, 2693–2698 (2011).
- 940 16. de Ridder, D. T. D., Lensvelt-Mulders, G., Finkenauer, C., Stok, F. M. & Baumeister, R. F.  
941 Taking Stock of Self-Control: A Meta-Analysis of How Trait Self-Control Relates to a Wide  
942 Range of Behaviors. *Pers Soc Psychol Rev* **16**, 76–99 (2012).
- 943 17. Tangney, J. P., Baumeister, R. F. & Boone, A. L. High Self-Control Predicts Good Adjustment,  
944 Less Pathology, Better Grades, and Interpersonal Success. *J Personality* **72**, 271–324 (2004).
- 945 18. Duckworth, A. L., Taxer, J. L., Eskreis-Winkler, L., Galla, B. M. & Gross, J. J. Self-Control  
946 and Academic Achievement. *Annu. Rev. Psychol.* **70**, 373–399 (2019).
- 947 19. Kim, E. J., Namkoong, K., Ku, T. & Kim, S. J. The Relationship Between Online Game  
948 Addiction and Aggression, Self-Control and Narcissistic Personality Traits. *Eur. psychiatr.* **23**,



- 949 212–218 (2008).
- 950 20. Liu, Q.-Q., Tu, W., Shang, Y.-F. & Xu, X.-P. Unique and interactive effects of parental neglect,  
951 school connectedness, and trait self-control on mobile short-form video dependence among  
952 Chinese left-behind adolescents. *Child Abuse & Neglect* **134**, 105939 (2022).
- 953 21. Robson, D. A., Allen, M. S. & Howard, S. J. Self-regulation in childhood as a predictor of future  
954 outcomes: A meta-analytic review. *Psychological Bulletin* **146**, 324–354 (2020).
- 955 22. Inzlicht, M., Werner, K. M., Briskin, J. L. & Roberts, B. W. Integrating Models of Self-  
956 Regulation. *Annu. Rev. Psychol.* **72**, 319–345 (2021).
- 957 23. Hofmann, W., Friese, M. & Strack, F. Impulse and Self-Control From a Dual-Systems  
958 Perspective. *Perspect Psychol Sci* **4**, 162–176 (2009).
- 959 24. Heatherton, T. F. & Wagner, D. D. Cognitive neuroscience of self-regulation failure. *Trends in*  
960 *Cognitive Sciences* **15**, 132–139 (2011).
- 961 25. Lyngs, U. *et al.* Self-Control in Cyberspace: Applying Dual Systems Theory to a Review of  
962 Digital Self-Control Tools. in *Proceedings of the 2019 CHI Conference on Human Factors in*  
963 *Computing Systems* 1–18 (ACM, 2019).
- 964 26. Kelley, W. M., Wagner, D. D. & Heatherton, T. F. In Search of a Human Self-Regulation System.  
965 *Annu. Rev. Neurosci.* **38**, 389–411 (2015).
- 966 27. Lopez, R. B. *et al.* A balance of activity in brain control and reward systems predicts self-  
967 regulatory outcomes. *Social Cognitive and Affective Neuroscience* **12**, 832–838 (2017).
- 968 28. Kohl, S. H. *et al.* Real-time fMRI neurofeedback training to improve eating behavior by self-  
969 regulation of the dorsolateral prefrontal cortex: A randomized controlled trial in overweight and  
970 obese subjects. *NeuroImage* **191**, 596–609 (2019).

- 971 29. Chen, F., He, Q., Han, Y., Zhang, Y. & Gao, X. Increased BOLD Signals in dlPFC Is Associated  
972 With Stronger Self-Control in Food-Related Decision-Making. *Front. Psychiatry* **9**, 689 (2018).
- 973 30. Friedman, N. P. & Robbins, T. W. The role of prefrontal cortex in cognitive control and  
974 executive function. *Neuropsychopharmacol.* **47**, 72–89 (2022).
- 975 31. Saunders, B., Milyavskaya, M., Etz, A., Randles, D. & Inzlicht, M. Reported Self-control is not  
976 Meaningfully Associated with Inhibition-related Executive Function: A Bayesian Analysis.  
977 *Collabra: Psychology* **4**, 39 (2018).
- 978 32. Nęcka, E., Gruszka, A., Orzechowski, J., Nowak, M. & Wójcik, N. The (In)significance of  
979 Executive Functions for the Trait of Self-Control: A Psychometric Study. *Front. Psychol.* **9**,  
980 1139 (2018).
- 981 33. Eisenberg, I. W. *et al.* Uncovering the structure of self-regulation through data-driven ontology  
982 discovery. *Nat Commun* **10**, 2319 (2019).
- 983 34. Pfeifer, J. H. & Allen, N. B. Arrested development? Reconsidering dual-systems models of  
984 brain function in adolescence and disorders. *Trends in Cognitive Sciences* **16**, 322–329 (2012).
- 985 35. Ridderinkhof, K. R., van den Wildenberg, W. P. M., Segalowitz, S. J. & Carter, C. S.  
986 Neurocognitive mechanisms of cognitive control: The role of prefrontal cortex in action  
987 selection, response inhibition, performance monitoring, and reward-based learning. *Brain and*  
988 *Cognition* **56**, 129–140 (2004).
- 989 36. Wilkowski, B. M. & Robinson, M. D. Cognitive Control Processes Underlying Individual  
990 Differences in Self-Control. in *Self-Regulation and Ego Control* 301–324 (Elsevier, 2016).
- 991 37. Friston, K. J., Harrison, L. & Penny, W. Dynamic causal modelling. *NeuroImage* **19**, 1273–  
992 1302 (2003).

- 993 38. Cardinal, R. N., Parkinson, J. A., Hall, J. & Everitt, B. J. Emotion and motivation: the role of  
994 the amygdala, ventral striatum, and prefrontal cortex. *Neuroscience & Biobehavioral Reviews*  
995 **26**, 321–352 (2002).
- 996 39. Sergerie, K., Chochol, C. & Armony, J. L. The role of the amygdala in emotional processing:  
997 A quantitative meta-analysis of functional neuroimaging studies. *Neuroscience &*  
998 *Biobehavioral Reviews* **32**, 811–830 (2008).
- 999 40. Wassum, K. M. & Izquierdo, A. The basolateral amygdala in reward learning and addiction.  
1000 *Neuroscience & Biobehavioral Reviews* **57**, 271–283 (2015).
- 1001 41. Vuilleumier, P., Richardson, M. P., Armony, J. L., Driver, J. & Dolan, R. J. Distant influences  
1002 of amygdala lesion on visual cortical activation during emotional face processing. *Nat Neurosci*  
1003 **7**, 1271–1278 (2004).
- 1004 42. Amaral, D. G., Behniea, H. & Kelly, J. L. Topographic organization of projections from the  
1005 amygdala to the visual cortex in the macaque monkey. *Neuroscience* **118**, 1099–1120 (2003).
- 1006 43. Smith, D. M. & Torregrossa, M. M. Valence encoding in the amygdala influences motivated  
1007 behavior. *Behavioural Brain Research* **411**, 113370 (2021).
- 1008 44. O’Neill, P.-K., Gore, F. & Salzman, C. D. Basolateral amygdala circuitry in positive and  
1009 negative valence. *Current Opinion in Neurobiology* **49**, 175–183 (2018).
- 1010 45. Belova, M. A., Paton, J. J. & Salzman, C. D. Moment-to-Moment Tracking of State Value in  
1011 the Amygdala. *J. Neurosci.* **28**, 10023–10030 (2008).
- 1012 46. Kim, J., Pignatelli, M., Xu, S., Itohara, S. & Tonegawa, S. Antagonistic negative and positive  
1013 neurons of the basolateral amygdala. *Nat Neurosci* **19**, 1636–1646 (2016).
- 1014 47. Tiedemann, L. J., Alink, A., Beck, J., Büchel, C. & Brassens, S. Valence Encoding Signals in the

- 1015 Human Amygdala and the Willingness to Eat. *J. Neurosci.* **40**, 5264–5272 (2020).
- 1016 48. Miller, E. K. & Cohen, J. D. An Integrative Theory of Prefrontal Cortex Function. *Annu. Rev.*  
1017 *Neurosci.* **24**, 167–202 (2001).
- 1018 49. Botvinick, M. M., Cohen, J. D. & Carter, C. S. Conflict monitoring and anterior cingulate cortex:  
1019 an update. *Trends in Cognitive Sciences* **8**, 539–546 (2004).
- 1020 50. Nachev, P., Kennard, C. & Husain, M. Functional role of the supplementary and pre-  
1021 supplementary motor areas. *Nat Rev Neurosci* **9**, 856–869 (2008).
- 1022 51. (Bud) Craig, A. D. How do you feel — now? The anterior insula and human awareness. *Nat*  
1023 *Rev Neurosci* **10**, 59–70 (2009).
- 1024 52. Niendam, T. A. *et al.* Meta-analytic evidence for a superordinate cognitive control network  
1025 subserving diverse executive functions. *Cogn Affect Behav Neurosci* **12**, 241–268 (2012).
- 1026 53. Cole, M. W., Yarkoni, T., Repovs, G., Anticevic, A. & Braver, T. S. Global Connectivity of  
1027 Prefrontal Cortex Predicts Cognitive Control and Intelligence. *Journal of Neuroscience* **32**,  
1028 8988–8999 (2012).
- 1029 54. Csikszentmihalyi, M. Toward a Psychology of Optimal Experience. in *Flow and the*  
1030 *Foundations of Positive Psychology* 209–226 (Springer Netherlands, 2014).
- 1031 55. Dietrich, A. Neurocognitive mechanisms underlying the experience of flow. *Consciousness and*  
1032 *Cognition* **13**, 746–761 (2004).
- 1033 56. Limb, C. J. & Braun, A. R. Neural Substrates of Spontaneous Musical Performance: An fMRI  
1034 Study of Jazz Improvisation. *PLoS ONE* **3**, e1679 (2008).
- 1035 57. Sheldon, K. M., Prentice, M. & Halusic, M. The Experiential Incompatibility of Mindfulness  
1036 and Flow Absorption. *Social Psychological and Personality Science* **6**, 276–283 (2015).

- 1037 58. Modinos, G., Ormel, J. & Aleman, A. Individual differences in dispositional mindfulness and  
1038 brain activity involved in reappraisal of emotion. *Social Cognitive and Affective Neuroscience*  
1039 **5**, 369–377 (2010).
- 1040 59. De Bruin, E. I., Meppelink, R. & Bögels, S. M. Mindfulness in Higher Education: Awareness  
1041 and Attention in University Students Increase During and After Participation in a Mindfulness  
1042 Curriculum Course. *Mindfulness* **6**, 1137–1142 (2015).
- 1043 60. McGarry, L. M. & Carter, A. G. Inhibitory Gating of Basolateral Amygdala Inputs to the  
1044 Prefrontal Cortex. *J. Neurosci.* **36**, 9391–9406 (2016).
- 1045 61. Dilgen, J., Tejada, H. A. & O'Donnell, P. Amygdala inputs drive feedforward inhibition in the  
1046 medial prefrontal cortex. *Journal of Neurophysiology* **110**, 221–229 (2013).
- 1047 62. Klein-Flügge, M. C. *et al.* Relationship between nuclei-specific amygdala connectivity and  
1048 mental health dimensions in humans. *Nat Hum Behav* **6**, 1705–1722 (2022).
- 1049 63. Ghashghaei, H. T., Hilgetag, C. C. & Barbas, H. Sequence of information processing for  
1050 emotions based on the anatomic dialogue between prefrontal cortex and amygdala. *NeuroImage*  
1051 **34**, 905–923 (2007).
- 1052 64. De Voogd, L. D. & Hermans, E. J. Meta-analytic evidence for downregulation of the amygdala  
1053 during working memory maintenance. *Human Brain Mapping* **43**, 2951–2971 (2022).
- 1054 65. Phan, K. L. *et al.* Neural substrates for voluntary suppression of negative affect: A functional  
1055 magnetic resonance imaging study. *Biological Psychiatry* **57**, 210–219 (2005).
- 1056 66. Yizhar, O. & Klavir, O. Reciprocal amygdala–prefrontal interactions in learning. *Current*  
1057 *Opinion in Neurobiology* **52**, 149–155 (2018).
- 1058 67. Bechara, A. Decision making, impulse control and loss of willpower to resist drugs: a

- 1059 neurocognitive perspective. *Nat Neurosci* **8**, 1458–1463 (2005).
- 1060 68. Casey, B. J., Getz, S. & Galvan, A. The adolescent brain. *Developmental Review* **28**, 62–77  
1061 (2008).
- 1062 69. Shulman, E. P. *et al.* The dual systems model: Review, reappraisal, and reaffirmation.  
1063 *Developmental Cognitive Neuroscience* **17**, 103–117 (2016).
- 1064 70. Hebb, D. O. *The organization of behavior: a neuropsychological theory.* (Psychology Press,  
1065 2005).
- 1066 71. Perlis, R. H. *et al.* Association Between Social Media Use and Self-reported Symptoms of  
1067 Depression in US Adults. *JAMA Netw Open* **4**, e2136113 (2021).
- 1068 72. Haber, S. N., Liu, H., Seidlitz, J. & Bullmore, E. Prefrontal connectomics: from anatomy to  
1069 human imaging. *Neuropsychopharmacol.* **47**, 20–40 (2022).
- 1070 73. Cho, J., Ahmed, S., Hilbert, M., Liu, B. & Luu, J. Do Search Algorithms Endanger Democracy?  
1071 An Experimental Investigation of Algorithm Effects on Political Polarization. *Journal of*  
1072 *Broadcasting & Electronic Media* **64**, 150–172 (2020).
- 1073 74. Meral, K. Z. Social Media Short Video-Sharing TikTok Application and Ethics: Data Privacy  
1074 and Addiction Issues. in *Advances in Information Security, Privacy, and Ethics* (eds. Taskiran,  
1075 M. N. & Pinarbaşı, F.) 147–165 (IGI Global, 2021).
- 1076 75. Elkins-Brown, N., Teper, R. & Inzlicht, M. How Mindfulness Enhances Self-Control. in  
1077 *Mindfulness in Social Psychology* (eds. Karremans, J. C. & Papiers, E. K.) 65–78 (Routledge,  
1078 2017).
- 1079 76. Schuman-Olivier, Z. *et al.* Mindfulness and Behavior Change. *Harv Rev Psychiatry* **28**, 371–  
1080 394 (2020).

- 1081 77. Tang, Y.-Y., Hölzel, B. K. & Posner, M. I. The neuroscience of mindfulness meditation. *Nat*  
1082 *Rev Neurosci* **16**, 213–225 (2015).
- 1083 78. Teper, R. & Inzlicht, M. Meditation, mindfulness and executive control: the importance of  
1084 emotional acceptance and brain-based performance monitoring. *Social Cognitive and Affective*  
1085 *Neuroscience* **8**, 85–92 (2013).
- 1086 79. Power, J. D., Barnes, K. A., Snyder, A. Z., Schlaggar, B. L. & Petersen, S. E. Spurious but  
1087 systematic correlations in functional connectivity MRI networks arise from subject motion.  
1088 *NeuroImage* **59**, 2142–2154 (2012).
- 1089 80. Tan, S. & Guo, Y. Revision of Self-Control Scale for Chinese college students. *Chinese Journal*  
1090 *of Clinical Psychology* **16**, 468–470 (2008).
- 1091 81. Patton, J. H., Stanford, M. S. & Barratt, E. S. Factor structure of the barratt impulsiveness scale.  
1092 *J. Clin. Psychol.* **51**, 768–774 (1995).
- 1093 82. Li, X.-Y. *et al.* Reliability and validity of an adapted Chinese version of Barratt Impulsiveness  
1094 Scale. *Chinese Mental Health Journal* **25**, 610–615 (2011).
- 1095 83. Baer, R. A. *et al.* Construct Validity of the Five Facet Mindfulness Questionnaire in Meditating  
1096 and Nonmeditating Samples. *Assessment* **15**, 329–342 (2008).
- 1097 84. Deng, Y.-Q., Liu, X.-H., Rodriguez, M. A. & Xia, C.-Y. The Five Facet Mindfulness  
1098 Questionnaire: Psychometric Properties of the Chinese Version. *Mindfulness* **2**, 123–128 (2011).
- 1099 85. Derogatis, L. R. *BSI 18, Brief Symptom Inventory 18: Administration, scoring and procedures*  
1100 *manual.* (NCS Pearson, Incorporated, 2001).
- 1101 86. Kaufman, J. N., Ross, T. J., Stein, E. A. & Garavan, H. Cingulate hypoactivity in cocaine users  
1102 during a GO-NOGO task as revealed by event-related functional magnetic resonance imaging.

- 1103 *J Neurosci* **23**, 7839–7843 (2003).
- 1104 87. Davidson, M. C., Amso, D., Anderson, L. C. & Diamond, A. Development of cognitive control  
1105 and executive functions from 4 to 13 years: evidence from manipulations of memory, inhibition,  
1106 and task switching. *Neuropsychologia* **44**, 2037–2078 (2006).
- 1107 88. Wang, C. *et al.* Effect of abacus training on executive function development and underlying  
1108 neural correlates in Chinese children. *Hum. Brain Mapp.* **38**, 5234–5249 (2017).
- 1109 89. Schandry, R. Heart Beat Perception and Emotional Experience. *Psychophysiology* **18**, 483–488  
1110 (1981).
- 1111 90. Cox, R. W. AFNI: Software for Analysis and Visualization of Functional Magnetic Resonance  
1112 Neuroimages. *Computers and Biomedical Research* **29**, 162–173 (1996).
- 1113 91. Windischberger, C. *et al.* On the origin of respiratory artifacts in BOLD-EPI of the human brain.  
1114 *Magnetic Resonance Imaging* **20**, 575–582 (2002).
- 1115 92. Tzourio-Mazoyer, N. *et al.* Automated Anatomical Labeling of Activations in SPM Using a  
1116 Macroscopic Anatomical Parcellation of the MNI MRI Single-Subject Brain. *NeuroImage* **15**,  
1117 273–289 (2002).
- 1118 93. Seghier, M. L., Josse, G., Leff, A. P. & Price, C. J. Lateralization is Predicted by Reduced  
1119 Coupling from the Left to Right Prefrontal Cortex during Semantic Decisions on Written Words.  
1120 *Cerebral Cortex* **21**, 1519–1531 (2011).
- 1121 94. Zeidman, P. *et al.* A guide to group effective connectivity analysis, part 1: First level analysis  
1122 with DCM for fMRI. *NeuroImage* **200**, 174–190 (2019).
- 1123 95. Tamietto, M., Pullens, P., de Gelder, B., Weiskrantz, L. & Goebel, R. Subcortical Connections  
1124 to Human Amygdala and Changes following Destruction of the Visual Cortex. *Current Biology*



- 1125        **22**, 1449–1455 (2012).
- 1126    96. Bencivenga, F., Sulpizio, V., Tullo, M. G. & Galati, G. Assessing the effective connectivity of
- 1127        premotor areas during real vs imagined grasping: a DCM-PEB approach. *NeuroImage* **230**,
- 1128        117806 (2021).
- 1129    97. Zeidman, P. *et al.* A guide to group effective connectivity analysis, part 2: Second level analysis
- 1130        with PEB. *NeuroImage* **200**, 12–25 (2019).

## Supplementary Materials

1131

1132 **Contents**

- 1133 1. The brain regions showing significant difference in activation between Like and Dislike  
1134 conditions in video-watching task
- 1135 2. The LOOCV result of correlation between trait self-control and brain activation
- 1136 3. The full mode for DCM and the PEB results
- 1137 4. Descriptive information on task performance and its correlation with trait self-control
- 1138 5. Supportive evidence for System II ROI selections based on meta-analysis
- 1139

1140 **1. The brain regions showing significant difference in activation between Like and Dislike**  
 1141 **conditions in video-watching task**  
 1142

**Table S1**

| Hemisphere | Region                    | BA        | MNI coordinate |       |       | T     | Cluster Size |
|------------|---------------------------|-----------|----------------|-------|-------|-------|--------------|
|            |                           |           | x              | y     | z     |       |              |
| Right      | Precuneus                 | 7,31      | 12             | -60   | 26    | 6.98  | 1505         |
| Right      | Anterior Cingulate Cortex | 6,8,24,32 | 2              | 17.5  | 46    | 7.26  | 1155         |
| Right      | Supplementary Motor Area  |           |                |       |       |       |              |
| Right      | Middle Occipital Gyrus    | 18,19,37  | 49.5           | -70   | 6     | -6.63 | 1058         |
|            | Inferior Occipital Gyrus  |           |                |       |       |       |              |
|            | Middle Temporal Gyrus     |           |                |       |       |       |              |
|            | Inferior Temporal Gyrus   |           |                |       |       |       |              |
| Right      | Middle Frontal Gyrus      | 8,9,10    | 27             | 47.5  | 18.5  | 7.84  | 891          |
|            | Superior Frontal Gyrus    |           |                |       |       |       |              |
| Left       | Middle Temporal Gyrus     | 19,37,39  | -43            | -65   | 3.5   | -6.74 | 803          |
|            | Middle Occipital Gyrus    |           |                |       |       |       |              |
| Right      | Superior Parietal Lobule  | 7,40      | 37             | -45   | 68.5  | -8.06 | 619          |
|            | Postcentral Gyrus         |           |                |       |       |       |              |
| Right      | Insula                    | 13,47     | 32             | 22.5  | 1     | 8.47  | 469          |
| Right      | Middle Cingulate Cortex   | 23,31     | 7              | -25   | 26    | 6.58  | 379          |
| Left       | Cerebellum                | /         | -40.5          | -50   | -46.5 | 6.37  | 360          |
| Left       | Superior Parietal Lobule  | 7         | -25.5          | -60   | 61    | -7.06 | 345          |
|            | Inferior Parietal Lobule  |           |                |       |       |       |              |
| Right      | Inferior Parietal Lobule  | 40        | 52             | -60   | 43.5  | 7.25  | 313          |
| Left       | Insula                    | 13,47     | -30.5          | 20    | 1     | 7.92  | 304          |
| Left       | Precentral Gyrus          | 3,4       | -40.5          | -15   | 53.5  | 7.99  | 299          |
|            | Postcentral Gyrus         |           |                |       |       |       |              |
| Left       | Middle Frontal Gyrus      | 10        | -30.5          | 45    | 18.5  | 5.31  | 167          |
|            | Superior Frontal Gyrus    |           |                |       |       |       |              |
| Right      | Middle Frontal Gyrus      | 6         | 27             | -10   | 56    | -9.33 | 156          |
| Left       | Superior Occipital Gyrus  | 19        | -23            | -82.5 | 33.5  | -6.71 | 149          |
| Right      | Cerebellum                | /         | 34.5           | -52.5 | -36.5 | 5.78  | 90           |
| Left       | Middle Frontal Gyrus      | 6         | -25.5          | -7.5  | 56    | -5.17 | 82           |
| Right      | OFC                       | 11        | 24.5           | 35    | -19   | 5.93  | 70           |
| Right      | Postcentral Gyrus         | /         | 59.5           | -22.5 | 43.5  | -4.66 | 62           |
| Left       | Middle Occipital Gyrus    | 18        | -25.5          | -95   | 6     | -4.45 | 50           |
| Left       | Amygdala、Hippocampus      | /         | -20.5          | -7.5  | -19   | -5.71 | 34           |
| Right      | Amygdala、Hippocampus      | /         | 22             | -7.5  | -14   | -4.98 | 22           |

1143  
 1144

1145 **2. The LOOCV result of correlation between trait self-control and brain activation**

1146 **2.1 Aim**

1147 To examine the robustness of the relationship between brain activities and self-reported  
1148 measurement on self-control, validation was performed by using a leave-one-out analysis via  
1149 MATLAB code (shared by Grigori Yourganov. [https://github.com/grigori-](https://github.com/grigori-yourganov/leave_one_out)  
1150 [yourganov/leave\\_one\\_out](https://github.com/grigori-yourganov/leave_one_out)).

1151 **2.2 Methods**

1152 Linear regression was used in present analysis, using the beta value of dlPFC, dACC, preSMA  
1153 and aIC extracted from the Dislike condition as predictors (together with anxiety, depression, gender,  
1154 and age) to predict the BSCS, BIS-11 and FFMQ, respectively. For every iteration, one observation  
1155 was removed and its outcome was predicted by an estimated model using all other observations.  
1156 After finishing iteration, the previous excluded observation was put back into the origin data set and  
1157 the next observation was removed to perform a new iteration. The above procedure would be  
1158 repeated until all observations have been selected.

1159 We calculated the Pearson's correlation between actual and predicted scores of BSCS, BIS-11  
1160 and FFMQ, and regarded it as a measure of generalization of current result.

1161 **2.3 Result**

1162 As shown in the Figure S1, the trait self-control (BSCS, BIS-11, and FFMQ) predicted by the  
1163 LOOCV model has a good fitting with their actual values. Their correlation coefficients are  
1164 moderate and all achieve significance ( $p < .05$ ), except for BSCS predicted by the activity of  
1165 preSMA under the dislike condition, which has a marginal significance ( $p = .06$ ).

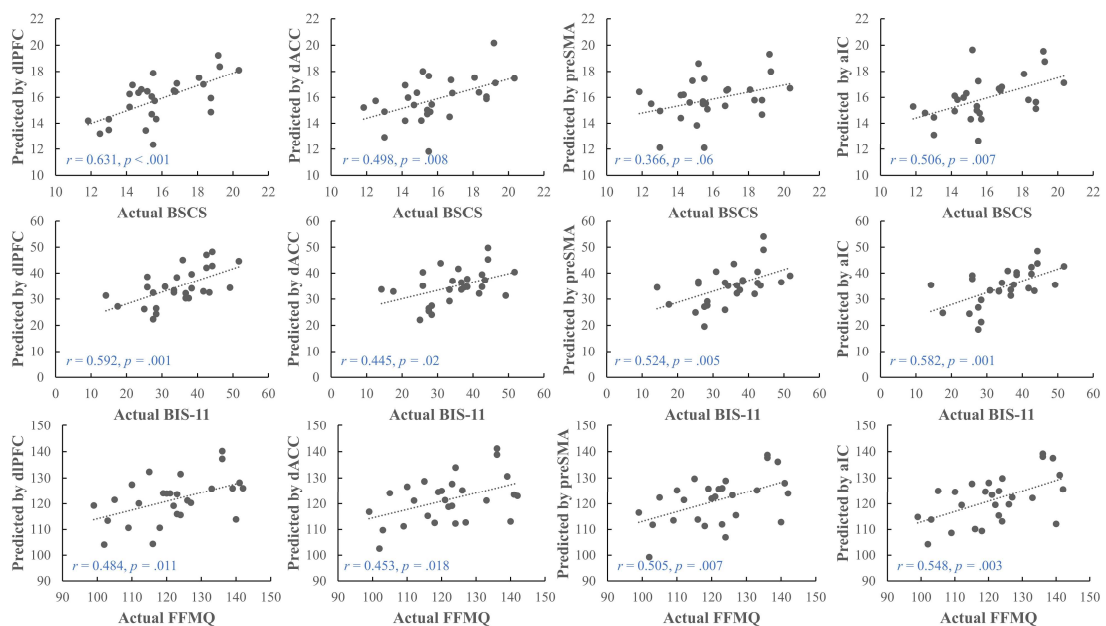

1166

1167 **Figure S1. The scatterplots of leave-one-out validation result.** The top row shows the Pearson's  
1168 correlation between the actual self-control scores (BSCS) and their estimated value predicted by the  
1169 regression coefficient (beta) of dlPFC (left), dACC (middle), preSMA (middle) and aIC (right)  
1170 under the Dislike condition. The middle row represents the predicted results for impulsivity (BIS-  
1171 11). And the bottom row depicts the results for mindfulness (FFMQ).

1172

1173 **3. The full model for DCM and the PEB results**

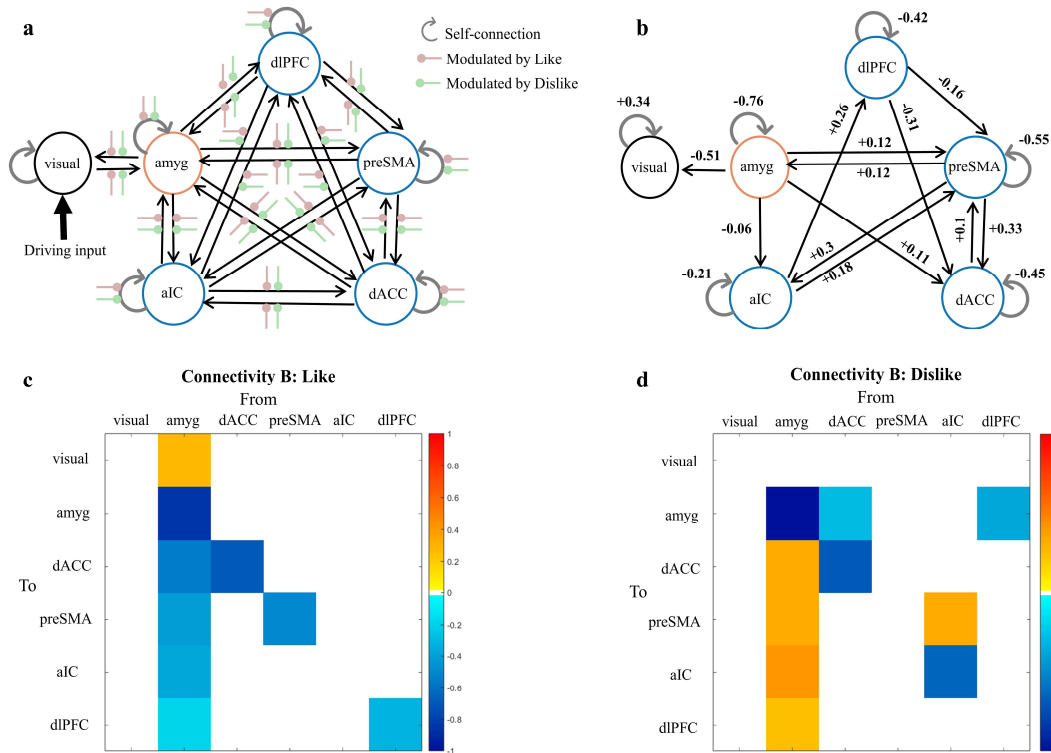

1174  
 1175 **Figure S2. The schematic diagram of the full model for DCM (a) and the group-level PEB**  
 1176 **results (b, c, d).** The parameters in matrix “A” represent baseline effective connectivity (b) and the  
 1177 two matrices “B” show modulatory parameters by Like (c) and Dislike (d) conditions. Only  
 1178 parameters with a posterior probability above 95 % were shown. Parameters on the leading diagonal  
 1179 of matrices are self-connection (unitless) and the off-diagonal parameters are between-region  
 1180 connection (rate of change, in units of hertz). Positive numbers (warm colors) indicate excitatory  
 1181 connection and negative ones (cool colors) mean inhibitory connection.  
 1182 Abbreviations: amyg, amygdala; dACC, dorsal anterior cingulate cortex; preSMA, pre-  
 1183 supplementary motor area; aIC, anterior insular cortex; dIPFC, dorsolateral prefrontal cortex.  
 1184

1185 **4. Descriptive information on task performance and its correlation with trait self-control**

1186 **4.1 Aim**

1187 As self-control is a multidimensional concept, we also examined the relationship between the  
1188 behavioral performance of the three tasks and three measurements of trait self-control.

1189 **4.2 Method**

1190 In the video watching task, we focused on three indicators, including the total number of short  
1191 videos each participant watched (Video num in Table S2), the proportion of videos being watched  
1192 to end (Like rate in Table S2) and that for these being switched (Dislike rate in Table S2).

1193 For the Go/No-Go task, the mean reaction time of successful Go trials and the rate of error of  
1194 NoGo trials (Commissions errors in Table S2) were used to characterize task performance.

1195 For the Dots task, the performance was indicated by the average response time and accuracy  
1196 across the three conditions (i.e., Congruent, Incongruent, and Mixed in in Table S2).

1197 The descriptive statistic results of these task measures and questionnaires were listed in the  
1198 table S2. After controlling for age, gender, anxiety, and depression, we calculated the partial  
1199 correlation between task indicators and self-report self-control.

1200 **4.3 Result**

1201 As shown in Table S2, the BSCS score showed significant correlation with BIS-11 but not  
1202 FFMQ, but the latter two correlated with each other, indicating the three questionnaires, while all  
1203 relate to trait self-control, may capture some distinct aspects of trait self-control.

1204 Regarding the relationships between trait self-control measures and behavioral measures from  
1205 experimental tasks, most correlations were not significant. Only the average response time under  
1206 the Mixed condition of the Dots task was significantly positively correlated with BSCS, and  
1207 significantly negatively correlated with BIS-11, but not significantly correlated with FFMQ.

1208

1209 **Table S2. Statistical information about questionnaires and behavioral indexes**

| Tasks          | Indexes                               | M      | SD    | Partial Correlation |          |          |
|----------------|---------------------------------------|--------|-------|---------------------|----------|----------|
|                |                                       |        |       | BSCS                | BIS-11   | FFMQ     |
| Questionnaires |                                       |        |       |                     |          |          |
|                | BSCS                                  | 15.88  | 2.23  | 1.00                | -.606 ** | .370     |
|                | BIS-11                                | 34.60  | 9.07  | -                   | 1.00     | -.627 ** |
|                | FFMQ                                  | 121.67 | 12.47 | -                   | -        | 1.00     |
| Video Watching |                                       |        |       |                     |          |          |
|                | Video num                             | 67.41  | 13.88 | -.015               | .224     | .055     |
|                | Dislike rate (%)                      | 46.17  | 15.33 | .079                | .166     | .081     |
|                | Like rate (%)                         | 35.21  | 20.00 | .077                | -.288    | .109     |
| Go/No-Go       |                                       |        |       |                     |          |          |
|                | Mean RT of Go trials                  | 417.83 | 44.96 | .068                | .016     | -.207    |
|                | Commission Errors (%)                 | 28.28  | 15.16 | .126                | .176     | -.064    |
| Dots           |                                       |        |       |                     |          |          |
|                | Accuracy of Congruent condition (%)   | 99.28  | 1.65  | .173                | .032     | .339     |
|                | Accuracy of Incongruent condition (%) | 98.66  | 2.71  | -.072               | .273     | .341     |
|                | Accuracy of Mixed condition (%)       | 94.55  | 3.89  | .229                | -.134    | -.121    |
|                | Mean RT of Congruent condition        | 343.65 | 37.43 | .378                | -.242    | -.207    |
|                | Mean RT of Incongruent condition      | 390.68 | 44.89 | .323                | -.252    | -.258    |
|                | Mean RT of Mixed condition            | 483.27 | 65.46 | .424 *              | -.455 *  | -.075    |

1210

1211 Note: \*  $p < .05$ , \*\*  $< .01$ . M, mean value; SD, standard deviation; BSCS, Brief Self Control Scale; BIS-11, Barratt  
1212 Impulsiveness Scale; FFMQ, Five Factor Mindfulness Questionnaire.

1213

1214 **5. Supportive evidence for System II ROI selections based on meta-analysis**

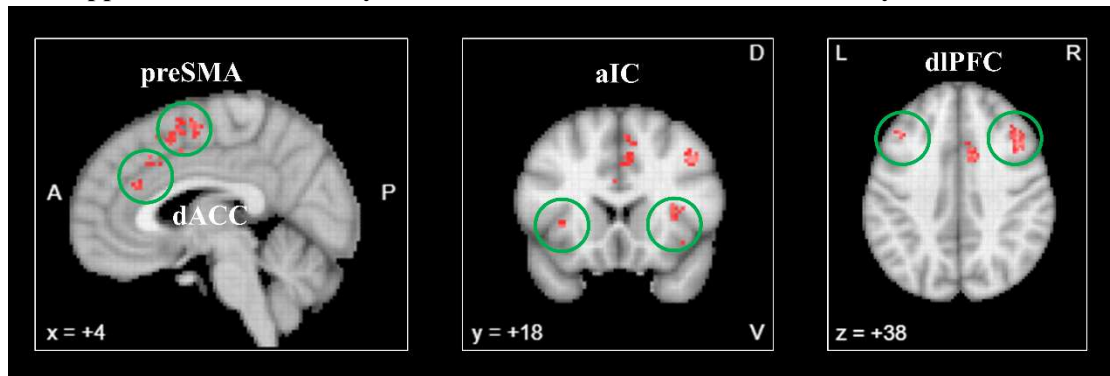

1215  
1216 **Figure S3. The activation map of “control” generated from meta-analysis of 3796 studies.** Here  
1217 we showed the association test map, from which we selected four brain regions (highlighted by the  
1218 green circles) to represent the control system (i.e., System II). These regions included dorsal anterior  
1219 cingulate cortex (dACC), pre-supplementary motor area (preSMA), anterior insula cortex (aIC), and  
1220 dorsolateral prefrontal cortex (dlPFC).

1221 Picture source: <https://neurosynth.org/analyses/terms/control/>
